# Supplementary material for: Metal-free base-mediated oxidative annulation cascades to 3-substituted-3-hydroxyoxindole and its 3-spirocyclic derivative
Source: Royal Society of Chemistry journal article supplement (doi:10.1039/c7gc01783a), 2017-01-01
Supplement: c7gc01783a1.pdf [file c7gc01783a1.pdf]

## Metal-Free Base-Mediated Oxidative Annulation Cascades to 3-Substituted-3-Hydroxyoxindole and its 3-Spirocyclic Derivative

Min Liu,<sup>†, a</sup> Chunxia Zhang,<sup>†, a</sup> Mingruo Ding,<sup>a</sup> Bencan Tang\*,<sup>b</sup> and Fengzhi Zhang\*

### *Supporting Information*

#### *Table of contents:*

|                                                         |    |
|---------------------------------------------------------|----|
| 1. General Information .....                            | 2  |
| 2. General methods of synthesizing the products .....   | 2  |
| 3. Synthesis and characterization of the products ..... | 3  |
| 4. Reaction intermediates confirmation .....            | 10 |
| 5. Reactions in the presence of TEMPO .....             | 11 |
| 6. NMR spectra .....                                    | 12 |

---

<sup>†</sup> These authors contributed equally to this work

<sup>a</sup> College of Pharmaceutical Science & Green Pharmaceutical Collaborative Innovation Center of Yangtze River Delta Region, Zhejiang University of Technology, Hangzhou, 310014, P. R. China

<sup>b</sup> Department of Chemical and Environment Engineering, Science and Engineering Building, The University of Nottingham Ningbo China, 199 Taikang East Road, Ningbo, 315100, P. R. China

\* Corresponding authors: [bencan.tang@nottingham.edu.cn](mailto:bencan.tang@nottingham.edu.cn), [zhangfengzhi@zjut.edu.cn](mailto:zhangfengzhi@zjut.edu.cn)

## 1. General information

All reagents were obtained from commercial suppliers and used without further purification. The starting materials were prepared according to the reported procedures.<sup>1-3</sup> Yields for all compounds were determined by the column chromatography which was generally performed on silica gel (200-300 mesh) using petroleum ether 40-60 (PE)/EtOAc as eluent, and reactions were monitored by thin layer chromatography (TLC) on a glass plate coated with silica gel with fluorescent indicator (GF254) using UV light. The <sup>1</sup>H and <sup>13</sup>C nuclear magnetic resonance (NMR) spectra were recorded on a Bruker ADNANCE III 500 MHz using CDCl<sub>3</sub> as solvent with TMS as internal standard. Chemical shifts are given in ppm (δ) referenced to CDCl<sub>3</sub> with 7.26 for <sup>1</sup>H and 77.16 for <sup>13</sup>C, and to DMSO-d<sub>6</sub> with 2.50 for <sup>1</sup>H and 39.52 for <sup>13</sup>C. Signals are abbreviated as follows: s, singlet; d, doublet; t, triplet; q, quartet; m, multiplet, and coupling constants are expressed in hertz. Melting points were measured on a SGW<sup>®</sup> X-4B apparatus and uncorrected. HRMS were recorded on Agilent 6210TOF LC/MS mass spectrometer.

## 2. General methods of synthesizing the products

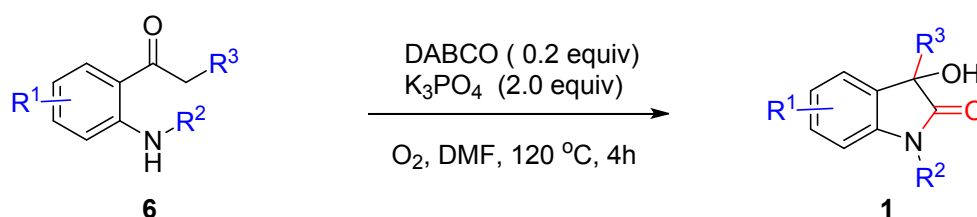

**General procedure A:** In a 10 mL microwave tube was charged with substrate **6** (0.2 mmol), anhydrous Potassium phosphate (0.4 mmol), DABCO (0.04 mmol), and anhydrous DMF 1.0 mL. The reaction mixture was evacuated and refilled with O<sub>2</sub> for 3 times before it was stirred at 120 °C for 4 h. The reaction mixture was then cooled to rt and diluted with water (5 mL) before it was extracted with EtOAc (30 mL). The combined organic phase were washed with water (3 x 5 mL) and saturated brine (10 mL), dried over anhydrous magnesium sulfate and concentrated in vacuo. The residue was purified by column chromatography (PE/EtOAc = 3:1) on silica gel to provide the desired product **1**.

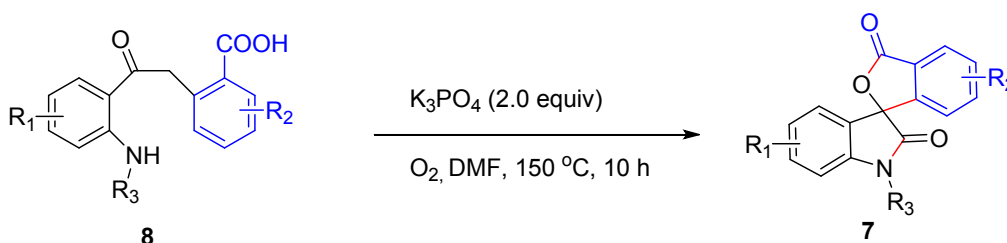

**General procedure B:** In a 10 mL microwave tube was charged with substrate **8** (0.2 mmol), anhydrous Potassium phosphate (0.4 mmol), and anhydrous DMF 1.0 mL. The reaction mixture was evacuated and refilled with O<sub>2</sub> for 3 times before it was stirred at 150 °C for 10 h. The reaction mixture was then cooled to rt and diluted with water (5 mL) before it was

extracted with EtOAc (30 mL). The combined organic phase were washed with water (3 x 5 mL) and saturated brine (10 mL), dried over anhydrous magnesium sulfate and concentrated in vacuo. The residue was purified by column chromatography (PE/EtOAc = 3:1) on silica gel to provide the desired product **7**.

### 3.Synthesis and characterization of the products:

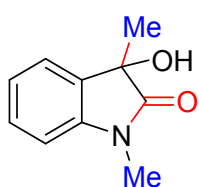

#### 3-hydroxy-1,3-dimethylindolin-2-one (**1a**):

Following the general procedure **A** (150 °C for 24h), **1a** which was purified by PE/EtOAc (3:1) and obtained as a yellow solid (29.7 mg, 84% yield).  $M_p$  = 148.2-149.0 °C;  $R_f$  = 0.15 (PE/EtOAc = 2:1);  $^1\text{H}$  NMR (500 MHz,  $\text{CDCl}_3$ )  $\delta$  7.43 (dd,  $J$  = 7.3, 0.6 Hz, 1H), 7.34 (td,  $J$  = 7.8, 1.2 Hz, 1H), 7.15 – 7.09 (m, 1H), 6.86 (d,  $J$  = 7.8 Hz, 1H), 3.21 (s, 3H), 1.62 (s, 3H) ppm. The spectra data are matched with those reported.<sup>4</sup>

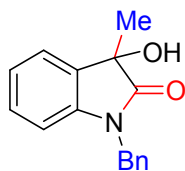

#### 1-benzyl-3-hydroxy-3-methylindolin-2-one (**1b**):

Following the general procedure **A** (150 °C for 24h), **1b** was purified by PE/EtOAc (3:1) and obtained as a white solid (47.0 mg, 93% yield).  $M_p$  = 144.1-145.0 °C;  $R_f$  = 0.22 (PE/EtOAc = 2:1);  $^1\text{H}$  NMR (500 MHz,  $\text{CDCl}_3$ )  $\delta$  7.44 (dd,  $J$  = 7.3, 0.5 Hz, 1H), 7.36 – 7.25 (m, 5H), 7.22 (td,  $J$  = 7.8, 1.2 Hz, 1H), 7.12 – 7.05 (m, 1H), 6.74 (d,  $J$  = 7.8 Hz, 1H), 4.98 (d,  $J$  = 15.7 Hz, 1H), 4.84 (d,  $J$  = 15.7 Hz, 1H), 3.26 (s, 1H), 1.69 (s, 3H) ppm. The spectra data are matched with those reported.<sup>5</sup>

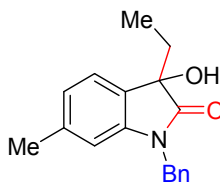

#### 1-benzyl-3-ethyl-3-hydroxy-6-methylindolin-2-one (**1c**):

Following the general procedure **A** (150 °C for 24h), **1c** was purified by PE/EtOAc (3:1) and obtained as a white solid (30.9 mg, 55% yield).  $M_p$  = 141.1-142.1 °C;  $R_f$  = 0.27 (PE/EtOAc = 2:1);  $^1\text{H}$  NMR (500 MHz,  $\text{CDCl}_3$ )  $\delta$  7.40 – 7.22 (m, 6H), 6.95 – 6.84 (m, 1H), 6.56 (s, 1H), 5.02 (d,  $J$  = 15.7 Hz, 1H), 4.75 (d,  $J$  = 15.7 Hz, 1H), 3.38 – 2.63 (m, 1H), 2.30 (s, 3H), 2.06 (t,  $J$  = 7.5 Hz, 2H), 0.80 (t,  $J$  = 7.5 Hz, 3H) ppm.  $^{13}\text{C}$  NMR (126 MHz,  $\text{CDCl}_3$ )  $\delta$  178.65, 142.97, 139.89, 135.75, 2x128.82, 127.64, 127.19, 126.75, 123.73, 123.67, 110.24, 43.76, 31.69, 21.90, 7.80. HRMS  $m/z$  (ESI): calcd for  $\text{C}_{18}\text{H}_{20}\text{NO}_2[\text{M} + \text{H}]^+$  282.1489, found 282.1487.

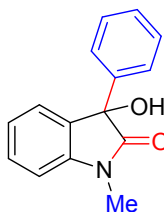

#### 3-hydroxy-1-methyl-3-phenylindolin-2-one (**1d**):

Following the general procedure **A**, **1d** was purified by PE/EtOAc (3:1) and obtained as a yellow solid (38.2 mg, 80% yield).  $M_p$  = 137.5-138.4 °C;  $R_f$  = 0.20 (PE/EtOAc = 2:1);  $^1\text{H}$  NMR (500 MHz,  $\text{CDCl}_3$ )  $\delta$  7.40 (ddd,  $J$  = 6.6, 3.7, 1.5 Hz, 2H), 7.38 – 7.28 (m, 5H), 7.10 (td,  $J$  = 7.6, 0.9 Hz, 1H), 6.92 (d,  $J$  = 7.8 Hz, 1H), 3.55 (s, 1H), 3.26 (s, 3H). The spectra data are matched with those reported.<sup>4</sup>

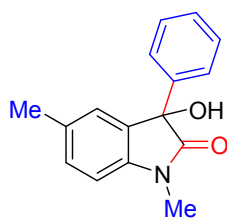

### 3-hydroxy-1,5-dimethyl-3-phenylindolin-2-one (1e):

Following the general procedure A, **1e** was purified by PE/EtOAc (3:1) and obtained as a yellow solid (41.5 mg, 82% yield).  $M_p$  = 116.2-117.1 °C;  $R_f$  = 0.20 (PE/EtOAc = 2:1);  $^1\text{H}$  NMR (500 MHz,  $\text{CDCl}_3$ )  $\delta$  7.43 – 7.37 (m, 2H), 7.37 – 7.29 (m, 3H), 7.16 (ddd,  $J$  = 7.9, 1.6, 0.7 Hz, 1H), 7.13 – 7.08 (m, 1H), 6.81 (d,  $J$  = 7.9 Hz, 1H), 3.25 (s, 3H), 2.31 (s, 3H) ppm. The spectra data are matched with those reported.<sup>4</sup>

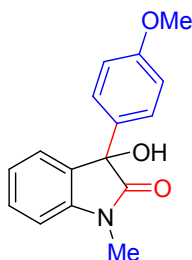

### 3-hydroxy-3-(4-methoxyphenyl)-1-methylindolin-2-one (1f):

Following the general procedure A, **1f** was purified by PE/EtOAc (3:1) and obtained as a yellow solid (43.0 mg, 80% yield).  $M_p$  = 142.5-143.7 °C;  $R_f$  = 0.15 (PE/EtOAc = 2:1);  $^1\text{H}$  NMR (500 MHz,  $\text{CDCl}_3$ ):  $\delta$  7.40 – 7.30 (m, 4H), 7.11 (td,  $J$  = 7.6, 0.9 Hz, 1H), 6.91 (d,  $J$  = 7.8 Hz, 1H), 6.88 – 6.84 (m, 2H), 3.79 (s, 3H), 3.41 (s, 1H), 3.25 (s, 3H) ppm. The spectra data are matched with those reported.<sup>6</sup>

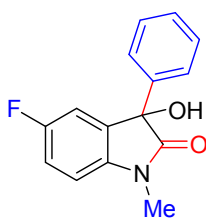

### 5-fluoro-3-hydroxy-1-methyl-3-phenylindolin-2-one (1g):

Following the general procedure A, **1g** was purified by PE/EtOAc (3:1) and obtained as a yellow solid (37.5 mg, 73% yield).  $M_p$  = 159.2-161.0 °C;  $R_f$  = 0.17 (PE/EtOAc = 2:1);  $^1\text{H}$  NMR (500 MHz,  $\text{CDCl}_3$ )  $\delta$  7.42 – 7.30 (m, 5H), 7.09 – 7.02 (m, 2H), 6.85 (dd,  $J$  = 8.4, 4.0 Hz, 1H), 3.26 (s, 3H) ppm. The spectra data are matched with those reported.<sup>4</sup>

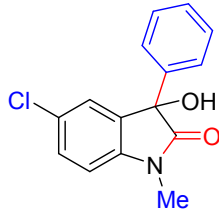

### 5-chloro-3-hydroxy-1-methyl-3-phenylindolin-2-one (1h):

Following the general procedure A, **1h** was purified by PE/EtOAc (3:1) and obtained as a yellow solid (43.7 mg, 80% yield).  $M_p$  = 169.5-171.0 °C;  $R_f$  = 0.22 (PE/EtOAc = 2:1);  $^1\text{H}$  NMR (500 MHz,  $\text{CDCl}_3$ )  $\delta$  7.40 – 7.31 (m, 6H), 7.29 – 7.25 (m, 1H), 6.85 (d,  $J$  = 8.3 Hz, 1H), 3.63 (s, 1H), 3.25 (s, 3H) ppm. The spectra data are matched with those reported.<sup>4</sup>

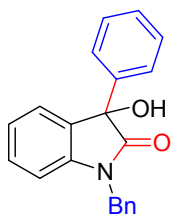

### 1-benzyl-3-hydroxy-3-phenylindolin-2-one (1i):

Following the general procedure A, **1i** was purified by PE/EtOAc (3:1) and obtained as a white solid (51.0 mg, 81% yield).  $M_p$  = 139.2-140.1 °C;  $R_f$  = 0.32 (PE/EtOAc = 2:1);  $^1\text{H}$  NMR (500 MHz,  $\text{CDCl}_3$ )  $\delta$  7.45 – 7.41 (m, 2H), 7.39 – 7.33 (m, 6H), 7.33 – 7.30 (m, 2H), 7.30 – 7.28 (m, 1H), 7.24 (td,  $J$  = 7.8, 1.3 Hz, 1H), 7.06 (td,  $J$  = 7.6, 0.9 Hz, 1H), 6.81 (d,  $J$  = 7.8 Hz, 1H), 5.07 (d,  $J$  = 15.7 Hz, 1H), 4.85 (d,  $J$  = 15.7 Hz, 1H), 3.48 (s, 1H) ppm. The spectra data are matched with those reported.<sup>7</sup>

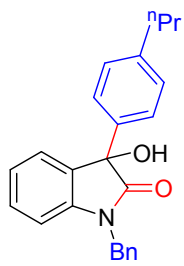

### 1-benzyl-3-hydroxy-3-(4-propylphenyl)indolin-2-one (1j):

Following the general Procedure A, **1j** was purified by PE/EtOAc (3:1) and obtained as a white solid (53.5 mg, 75% yield).  $M_p$  = 137.2–138.1 °C;  $R_f$  = 0.42 (PE/EtOAc = 2:1);  $^1\text{H}$  NMR (500 MHz,  $\text{CDCl}_3$ )  $\delta$  7.38 – 7.28 (m, 7H), 7.23 (td,  $J$  = 7.8, 1.1 Hz, 1H), 7.17 (d,  $J$  = 8.2 Hz, 2H), 7.06 (t,  $J$  = 7.5 Hz, 1H), 6.79 (d,  $J$  = 7.9 Hz, 1H), 5.06 (d,  $J$  = 15.7 Hz, 1H), 4.85 (d,  $J$  = 15.7 Hz, 1H), 3.45 (s, 1H), 2.66 – 2.49 (m, 2H), 1.63 (dd,  $J$  = 15.1, 7.5 Hz, 2H), 0.95 (t,  $J$  = 7.3 Hz, 3H) ppm;  $^{13}\text{C}$  NMR (126 MHz,  $\text{CDCl}_3$ )  $\delta$  177.76, 142.99, 142.67, 137.43, 135.49, 131.67, 129.71, 128.89, 128.80, 127.78, 127.30, 125.26, 125.02, 123.51, 109.73, 77.92, 44.05, 37.72, 24.42, 13.85. HRMS  $m/z$  (ESI): calcd for  $\text{C}_{24}\text{H}_{23}\text{NNaO}_2$   $[\text{M} + \text{Na}]^+$  380.1621, found 380.1613.

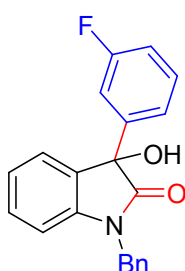

**1-benzyl-3-(3-fluorophenyl)-3-hydroxyindolin-2-one (1k):**

Following the general Procedure A, **1k** was purified by PE/EtOAc (3:1) and obtained as a white solid (45.9 mg, 69% yield).  $M_p$  = 174.2–175.3 °C;  $R_f$  = 0.40 (PE/EtOAc = 2:1);  $^1\text{H}$  NMR (500 MHz,  $\text{CDCl}_3$ )  $\delta$  7.40 – 7.22 (m, 8H), 7.21 – 7.16 (m, 1H), 7.14 (d,  $J$  = 7.9 Hz, 1H), 7.07 (dd,  $J$  = 11.1, 4.0 Hz, 1H), 7.01 (td,  $J$  = 8.3, 1.9 Hz, 1H), 6.82 (d,  $J$  = 7.8 Hz, 1H), 5.04 (d,  $J$  = 15.6 Hz, 1H), 4.85 (d,  $J$  = 15.6 Hz, 1H) ppm.  $^{13}\text{C}$  NMR (126 MHz,  $\text{CDCl}_3$ )  $\delta$  177.19 (s), 162.95 (d,  $J$  = 246.8 Hz), 142.77 (s), 142.59 (s), 135.29 (s), 131.29 (s), 130.23 (d,  $J$  = 8.0 Hz), 130.05 (s), 128.94 (s), 127.98 (d,  $J$  = 2.9 Hz), 127.33 (s), 124.96 (s), 123.74 (s), 120.97 (s), 115.29 (d,  $J$  = 21.1 Hz), 112.80 (d,  $J$  = 24.2 Hz), 109.91 (s), 77.66 (s), 44.15 (s). HRMS  $m/z$  (ESI): calcd for  $\text{C}_{21}\text{H}_{16}\text{FNNaO}_2$   $[\text{M} + \text{Na}]^+$  356.1057, found 356.1064.

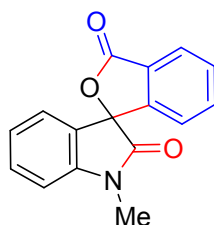

**1-methyl-3'H-spiro[indoline-3,1'-isobenzofuran]-2,3'-dione (7a):**

Following the general procedure B, **7a** was purified by PE/EtOAc (3:1) and obtained as a white solid (38.2 mg, 72% yield);  $M_p$  = 202.5–203.5 °C;  $R_f$  = 0.20 (PE/EtOAc = 3:1);  $^1\text{H}$  NMR (500 MHz,  $\text{DMSO}-d_6$ )  $\delta$  8.04 (d,  $J$  = 7.4 Hz, 1H), 7.78 (td,  $J$  = 7.4, 1.1 Hz, 1H), 7.73 (td,  $J$  = 7.4, 0.9 Hz, 1H), 7.54 (td,  $J$  = 7.8, 1.2 Hz, 1H), 7.32 (d,  $J$  = 7.5 Hz, 1H), 7.28 (d,  $J$  = 7.9 Hz, 1H), 7.22–7.17 (m, 1H), 7.11 (td,  $J$  = 7.5, 0.6 Hz, 1H), 3.26 (s, 3H) ppm;  $^{13}\text{C}$  NMR (126 MHz,  $\text{DMSO}-d_6$ )  $\delta$  170.6, 169.2, 146.5, 144.6, 135.5, 131.8, 130.7, 125.5, 125.0, 125.0, 124.1, 123.6, 122.3, 110.1, 84.2, 26.9 ppm; HRMS  $m/z$  (ESI) : calcd for  $\text{C}_{16}\text{H}_{11}\text{NO}_3$   $[\text{M} + \text{H}]^+$  266.0812, found 266.0812.

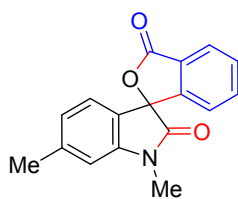

**1,6-dimethyl-3'H-spiro[indoline-3,1'-isobenzofuran]-2,3'-dione (7b):**

Following the general procedure B, **7b** was purified by PE/EtOAc (3:1) and obtained as a white solid (28.4 mg, 51% yield);  $M_p$  = 209.6–210.6 °C;  $R_f$  = 0.20 (PE/EtOAc = 3:1);  $^1\text{H}$  NMR (500 MHz,  $\text{CDCl}_3$ )  $\delta$  8.01 (dd,  $J$  = 6.1, 2.1 Hz, 1H), 7.64–7.60 (m, 2H), 7.10 (dd,  $J$  = 5.9, 1.8 Hz, 1H), 6.90 (s, 2H), 6.82 (s, 1H), 3.29 (s, 3H), 2.44 (s, 3H) ppm;  $^{13}\text{C}$  NMR (126 MHz,  $\text{CDCl}_3$ )  $\delta$  171.5, 169.6, 147.0, 144.7, 142.4, 134.7, 130.2, 126.1, 126.0, 125.0, 124.3, 121.9, 121.8, 110.0, 84.5, 26.9, 22.1 ppm; HRMS  $m/z$  (ESI) calcd for  $\text{C}_{17}\text{H}_{14}\text{NO}_3$   $[\text{M} + \text{H}]^+$  280.0971, found 280.0968.

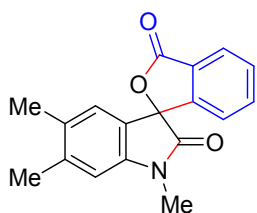

**1,5,6-trimethyl-3'H-spiro[indoline-3,1'-isobenzofuran]-2,3'-dione (7c):**

Following the general procedure **B**, with the addition of anhydrous Potassium phosphate (84.8 mg, 0.4 mmol) and DABCO (22.4mg, 0.2 mmol). **7c** was purified by column chromatography (PE/EtOAc = 3:1) on silica gel and obtained as a white solid (31.6 mg, 54% yield);  $M_p$  = 205.1-206.1 °C;  $R_f$  = 0.22 (PE/EtOAc = 3:1);  $^1\text{H}$  NMR (500 MHz,  $\text{CDCl}_3$ )  $\delta$  8.04–7.99 (m, 1H), 7.66–7.56 (m, 2H), 7.10 (dd,  $J$  = 5.9, 1.8 Hz, 1H), 6.79 (d,  $J$  = 2.1 Hz, 2H), 3.28 (s, 3H), 2.35 (s, 3H), 2.17 (s, 3H) ppm;  $^{13}\text{C}$  NMR (126 MHz,  $\text{CDCl}_3$ )  $\delta$  171.4, 169.7, 147.2, 142.6, 140.5, 134.7, 132.0, 130.2, 126.2, 126.1, 126.0, 121.9, 121.9, 110.6, 84.8, 27.0, 20.5, 19.3 ppm; HRMS  $m/z$  (ESI): calcd for  $\text{C}_{18}\text{H}_{15}\text{NO}_3$   $[\text{M} + \text{H}]^+$  294.1139, found 294.1125.

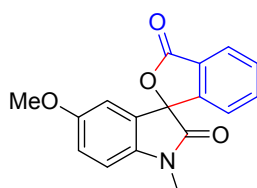

**5-methoxy-1-methyl-3'H-spiro[indoline-3,1'-isobenzofuran]-2,3'-dione (7d):**

Following the general procedure **B**, with the addition of anhydrous Potassium phosphate (42.4 mg, 0.2 mmol) and DABCO (22.4mg, 0.2 mmol). **7d** was purified by column chromatography (PE/EtOAc = 3:1) on silica gel and obtained as a white solid (31.3 mg, 53% yield);  $M_p$  = 161-162 °C;  $R_f$  = 0.21 (PE/EtOAc = 2:1);  $^1\text{H}$  NMR (500 MHz,  $\text{CDCl}_3$ )  $\delta$  8.01 (dd,  $J$  = 6.2, 1.8 Hz, 1H), 7.65–7.59 (m, 2H), 7.11 (dd,  $J$  = 6.2, 1.5 Hz, 1H), 6.97 (dd,  $J$  = 8.6, 2.5 Hz, 1H), 6.91 (d,  $J$  = 8.6 Hz, 1H), 6.61 (d,  $J$  = 2.5 Hz, 1H), 3.71 (s, 3H), 3.28 (s, 3H) ppm.  $^{13}\text{C}$  NMR (126 MHz,  $\text{CDCl}_3$ )  $\delta$  171.0, 169.6, 156.8, 147.0, 137.9, 134.9, 130.4, 126.2, 126.0, 125.9, 121.9, 116.6, 111.8, 109.8, 84.8, 55.9, 27.1 ppm; HRMS  $m/z$  (ESI) calcd for  $\text{C}_{17}\text{H}_{14}\text{NO}_4$   $[\text{M} + \text{H}]^+$  296.0911, found 296.0917.

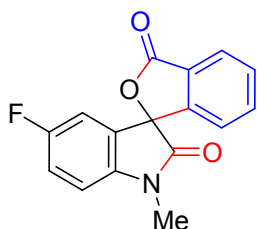

**5-fluoro-1-methyl-3'H-spiro[indoline-3,1'-isobenzofuran]-2,3'-dione (7e):**

Following the general procedure **B**, **7e** was purified by PE/EtOAc (3:1) and obtained as a white solid (31.7 mg, 56% yield);  $M_p$  = 193-194 °C;  $R_f$  = 0.24 (PE/EtOAc = 3:1);  $^1\text{H}$  NMR (500 MHz,  $\text{CDCl}_3$ )  $\delta$  7.67 (dd,  $J$  = 7.0, 2.3 Hz, 1H), 7.48 (td,  $J$  = 7.8, 1.3 Hz, 1H), 7.35 (td,  $J$  = 8.5, 2.4 Hz, 1H), 7.13–7.10 (m, 1H), 7.09 (t,  $J$  = 4.2 Hz, 1H), 7.04 (dd,  $J$  = 7.5, 0.9 Hz, 1H), 7.01 (d,  $J$  = 7.9 Hz, 1H), 3.31 (s, 3 H) ppm;  $^{13}\text{C}$  NMR (126 MHz,  $\text{CDCl}_3$ )  $\delta$  171.0 (s), 169.2 (s), 160.5 (s), 158.6 (s), 146.3 (s), 140.5 (d,  $J$  = 2.2 Hz), 134.9 (s), 130.6 (s), 126.3 (d,  $J$  = 9.5 Hz), 125.7 (s), 121.8 (s), 118.1 (d,  $J$  = 23.6 Hz), 113.3 (d,  $J$  = 25.3 Hz), 101.0 (d,  $J$  = 7.9 Hz), 84.1 (s), 27.2 (s) ppm; HRMS  $m/z$  (ESI) calcd for  $\text{C}_{16}\text{H}_{10}\text{FNO}_3$   $[\text{M} + \text{H}]^+$  284.0720, found 284.0717.

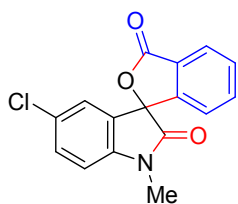

**5-chloro-1-methyl-3'H-spiro[indoline-3,1'-isobenzofuran]-2,3'-dione (7f):**

Following the general procedure **B**, **7f** was purified by PE/EtOAc (3:1) and obtained as a white solid (33.5 mg, 56% yield);  $M_p$  = 177-178 °C;  $R_f$  = 0.23 (PE/EtOAc = 3:1);  $^1\text{H}$  NMR (500 MHz,  $\text{DMSO}-d_6$ )  $\delta$  8.05–8.02 (m, 1H), 7.78 (td,  $J$  = 7.5, 1.3 Hz, 1H), 7.74 (td,  $J$  = 7.4, 1.1 Hz,

1H), 7.61 (dd,  $J = 8.4, 2.2$  Hz, 1H), 7.46 (d,  $J = 2.2$  Hz, 1H), 7.36 (dd,  $J = 4.6, 3.7$  Hz, 1H), 7.31 (d,  $J = 8.5$  Hz, 1H), 3.26 (s, 3 H) ppm;  $^{13}\text{C}$  NMR (126 MHz,  $\text{CDCl}_3$ )  $\delta$  170.8, 169.1, 146.2, 143.2, 135.0, 131.6, 130.7, 129.2, 126.4, 126.3, 125.7, 125.6, 121.8, 110.3, 83.9, 27.2 ppm; HRMS  $m/z$  (ESI) calcd for  $\text{C}_{16}\text{H}_{10}\text{ClNO}_3$   $[\text{M} + \text{H}]^+$  322.0246, found 322.0241.

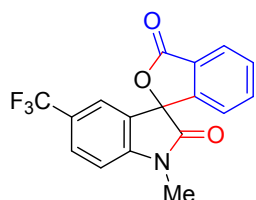

**1-methyl-5-(trifluoromethyl)-3'H-spiro[indoline-3,1'-isobenzofuran]-2,3'-dione (7g):**

Following the general procedure **B**, **7g** was purified by PE/EtOAc (3:1) and obtained as a white solid (37.3 mg, 56% yield).  $M_p = 200.1$ – $200.8$  °C;  $R_f = 0.25$  (PE/EtOAc = 3:1);  $^1\text{H}$  NMR (500 MHz,  $\text{CDCl}_3$ )  $\delta$  8.10–8.00 (m, 1 H), 7.75 (dd,  $J = 8.3, 0.9$  Hz, 1 H), 7.71–7.62 (m, 2 H), 7.27 (d,  $J = 1.9$  Hz, 1 H), 7.19–7.04 (m, 2 H), 3.35 (s, 3 H) ppm;  $^{13}\text{C}$  NMR (126 MHz,  $\text{CDCl}_3$ )  $\delta$  171.2 (s), 169.0 (s), 147.6 (s), 145.9 (s), 135.1 (s), 130.8 (s), 129.4 (q,  $J = 3.9$  Hz), 126.4 (s), 126.1 (s), 125.8 (s), 125.6 (s), 123.7 (d,  $J = 271.9$  Hz), 122.4 (q,  $J = 3.7$  Hz), 121.8 (s), 109.2 (s), 83.5 (s), 27.3 (s) ppm; HRMS  $m/z$  (ESI): calcd for  $\text{C}_{17}\text{H}_{10}\text{F}_3\text{NO}_3$   $[\text{M} + \text{H}]^+$  334.0690, found 334.0686.

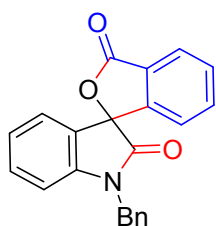

**1-benzyl-3'H-spiro[indoline-3,1'-isobenzofuran]-2,3'-dione (7h):**

Following the general procedure **B**, **7h** was purified by PE/EtOAc (3:1) and obtained as a white solid (40.9 mg, 60% yield).  $M_p = 163.5$ – $164.5$  °C;  $R_f = 0.23$  (PE/EtOAc = 3:1);  $^1\text{H}$  NMR (500 MHz,  $\text{DMSO}-d_6$ )  $\delta$  8.07 (d,  $J = 7.5$  Hz, 1H),  $\delta$  7.84–7.79 (m, 1H), 7.76 (t,  $J = 7.4$  Hz, 1H), 7.46 (td,  $J = 7.9, 1.0$  Hz, 1H), 7.43–7.30 (m, 5H), 7.29 (d,  $J = 7.5$  Hz, 1H), 7.24 (d,  $J = 7.3$  Hz, 1H), 7.21 (d,  $J = 7.9$  Hz, 1H), 7.09 (t,  $J = 7.5$  Hz, 1H), 5.02 (d,  $J = 3.3$  Hz, 2H) ppm;  $^{13}\text{C}$  NMR (126 MHz,  $\text{DMSO}-d_6$ )  $\delta$  170.9, 169.1, 146.4, 143.5, 135.7, 135.6, 131.8, 130.8, 128.9, 127.7, 127.2, 125.7, 125.4, 125.0, 124.1, 123.8, 122.1, 110.7, 84.1, 43.5 ppm; HRMS  $m/z$  (ESI): calcd for  $\text{C}_{22}\text{H}_{15}\text{NO}_3$   $[\text{M} + \text{H}]^+$  342.1128, found 342.1125.

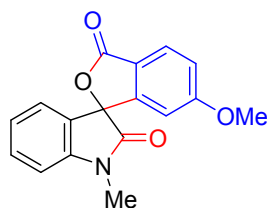

**6'-methoxy-1-methyl-3'H-spiro(indoline-3,1'-isobenzofuran)-2,3'-dione (7i):**

Following the general procedure **B**, **7i** was purified by PE/EtOAc (2:1) and obtained as a white solid (32.4 mg, 55% yield);  $M_p = 187.5$ – $188.5$  °C;  $R_f = 0.21$  (PE/EtOAc = 2:1);  $^1\text{H}$  NMR (500 MHz,  $\text{CDCl}_3$ )  $\delta$  7.90 (d,  $J = 8.5$  Hz, 1H), 7.46 (td,  $J = 7.8, 1.2$  Hz, 1H), 7.14–7.07 (m, 2H), 7.04 (dd,  $J = 7.4, 0.8$  Hz, 1H), 7.00 (d,  $J = 7.9$  Hz, 1H), 6.47 (d,  $J = 2.0$  Hz, 1H), 3.80 (s, 3H), 3.31 (s, 3H) ppm;  $^{13}\text{C}$  NMR (126 MHz,  $\text{CDCl}_3$ )  $\delta$  171.3, 169.2, 165.26, 149.5, 144.6, 131.6, 127.5, 125.2, 125.0, 123.8, 118.2, 117.9, 109.1, 105.6, 83.8, 55.9, 27.0 ppm; HRMS  $m/z$  (ESI): calcd for  $\text{C}_{17}\text{H}_{13}\text{NO}_4$   $[\text{M} + \text{H}]^+$  296.0920, found 296.0917.

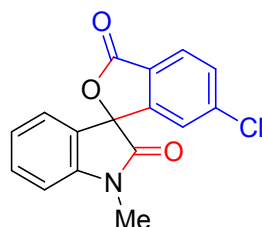

**6'-chloro-1-methyl-3'H-spiro[indoline-3,1'-isobenzofuran]-2,3'-dione (7j):**



Following the general procedure **B**, **7j** was purified by PE/EtOAc (3:1) and obtained as a white solid (29.9 mg, 50% yield);  $M_p$  = 203.5-204.5 °C;  $R_f$  = 0.23 (PE/EtOAc = 3:1);  $^1\text{H}$  NMR (500 MHz,  $\text{CDCl}_3$ )  $\delta$  7.95 (d,  $J$  = 8.1 Hz, 1H), 7.59 (dd,  $J$  = 8.2, 1.7 Hz, 1H), 7.49 (td,  $J$  = 7.8, 1.3 Hz, 1H), 7.12 (td,  $J$  = 7.6, 0.8 Hz, 1H), 7.09 (d,  $J$  = 1.4 Hz, 1H), 7.05 (dd,  $J$  = 7.4, 0.9 Hz, 1H), 7.02 (d,  $J$  = 7.9 Hz, 1H), 3.32 (s, 3H) ppm.  $^{13}\text{C}$  NMR (126 MHz,  $\text{CDCl}_3$ )  $\delta$  170.6, 168.3, 148.3, 144.6, 141.5, 132.0, 131.1, 127.2, 125.2, 124.5, 124.1, 124.0, 122.3, 109.3, 83.9, 27.1 ppm; HRMS  $m/z$  (ESI) : calcd for  $\text{C}_{16}\text{H}_{10}\text{ClNO}_3$   $[\text{M} + \text{H}]^+$  300.0424, found 300.0422.

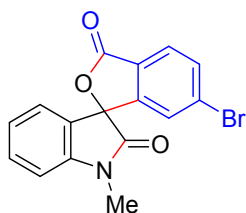

**6'-bromo-1-methyl-3'H-spiro[indoline-3,1'-isobenzofuran]-2,3'-dione (7k):**

Following the general procedure **B**, with the addition of anhydrous Potassium phosphate (42.4 mg, 0.2 mmol) and DABCO (22.4mg, 0.2 mmol). **7k** was purified by column chromatography (PE/EtOAc = 3:1) on silica gel and obtained as a white solid (37.6 mg, 55% yield);  $M_p$  = 224.8-225.8 °C;  $R_f$  = 0.21 (PE/EtOAc = 3:1);  $^1\text{H}$  NMR (500 MHz,  $\text{CDCl}_3$ )  $\delta$  7.67 (dd,  $J$  = 7.0, 2.3 Hz, 1H), 7.48 (td,  $J$  = 7.8, 1.3 Hz, 1H), 7.35 (td,  $J$  = 8.5, 2.4 Hz, 1H), 7.14–7.11 (m, 1H), 7.09 (t,  $J$  = 4.2 Hz, 1H), 7.04 (dd,  $J$  = 7.5, 0.9 Hz, 1H), 7.01 (d,  $J$  = 7.9 Hz, 1H), 3.31 (s, 3H) ppm;  $^{13}\text{C}$  NMR (126 MHz,  $\text{CDCl}_3$ )  $\delta$  170.6, 168.5, 148.4, 144.6, 134.0, 132.0, 130.0, 127.3, 125.3, 125.3, 125.0, 124.1, 124.0, 109.3, 83.9, 27.1 ppm; HRMS  $m/z$  (ESI): calcd for  $\text{C}_{16}\text{H}_{10}\text{BrNO}_3$   $[\text{M} + \text{H}]^+$  343.9923, found 343.9917.

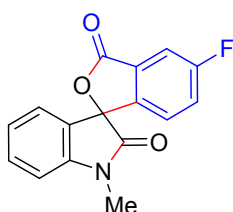

**5'-fluoro-1-methyl-3'H-spiro[indoline-3,1'-isobenzofuran]-2,3'-dione (7l):**

Following the general procedure **B**, with the addition of anhydrous Potassium phosphate (42.4 mg, 0.2 mmol) and DABCO (22.4mg, 0.2 mmol). **7l** was purified by column chromatography (PE/EtOAc = 3:1) on silica gel and obtained as a white solid (33.9 mg, 60% yield);  $M_p$  = 193-194 °C;  $R_f$  = 0.23 (PE/EtOAc = 3:1);  $^1\text{H}$  NMR (500 MHz,  $\text{CDCl}_3$ )  $\delta$  7.89–7.87 (m, 1H), 7.75 (dd,  $J$  = 8.2, 1.6 Hz, 1H), 7.49 (td,  $J$  = 7.8, 1.3 Hz, 1H), 7.26–7.26 (m, 1H), 7.12 (td,  $J$  = 7.6, 0.9 Hz, 1H), 7.05 (dd,  $J$  = 7.5, 0.8 Hz, 1H), 7.02 (d,  $J$  = 7.9 Hz, 1H), 3.32 (s, 3H) ppm;  $^{13}\text{C}$  NMR (126 MHz,  $\text{CDCl}_3$ )  $\delta$  169.5 (d,  $J$  = 322.9 Hz), 163.8 (d,  $J$  = 251.5 Hz), 144.6 (s), 142.3 (d,  $J$  = 2.3 Hz), 131.9 (s), 128.3 (d,  $J$  = 9.3 Hz), 125.2 (s), 124.3 (s), 123.9 (s), 123.8 (d,  $J$  = 8.8 Hz), 122.8 (d,  $J$  = 24.3 Hz), 112.6 (s), 112.4 (s), 109.3 (s), 84.3 (s), 27.0 (s) ppm; HRMS  $m/z$  (ESI) calcd for  $\text{C}_{16}\text{H}_{10}\text{FNO}_3$   $[\text{M} + \text{H}]^+$  284.0720, found 284.0717.

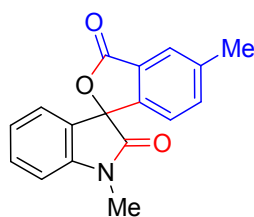

**1,5'-dimethyl-3'H-spiro[indoline-3,1'-isobenzofuran]-2,3'-dione (7m):**

Following the general procedure **B**, **7m** was purified by PE/EtOAc (3:1) and obtained as a white solid (38.5 mg, 69% yield);  $M_p$  = 218.7-219.4 °C;  $R_f$  = 0.21 (PE/EtOAc = 3:1);  $^1\text{H}$  NMR (500 MHz,  $\text{DMSO}-d_6$ )  $\delta$  7.84 (s, 1H), 7.58 (dd,  $J$  = 7.9, 0.7 Hz, 1H), 7.53 (td,  $J$  = 7.8, 1.3 Hz, 1H), 7.27 (d,  $J$  = 7.9 Hz, 1H), 7.19 (d,  $J$  = 7.9 Hz, 1H), 7.16 (dd,  $J$  = 7.4, 0.9 Hz, 1H), 7.10 (td,  $J$  = 7.5, 0.7 Hz, 1H), 3.25 (s, 3H), 2.46 (s, 3H) ppm;  $^{13}\text{C}$  NMR (126 MHz,  $\text{CDCl}_3$ )  $\delta$



171.4, 169.7, 144.6, 144.2, 140.9, 135.9, 131.6, 126.2, 126.1, 125.2, 125.0, 123.7, 121.5, 109.1, 84.3, 27.0, 21.3 ppm; HRMS  $m/z$  (ESI): calcd for  $C_{17}H_{14}NO_3$   $[M + H]^+$  280.0966, found 280.0968

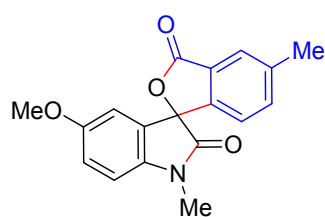

**5-methoxy-1,5'-dimethyl-3'H-spiro[indoline-3,1'-isobenzofuran]-2,3'-dione (7n):**

Following the general procedure **B**, with the addition of anhydrous Potassium phosphate (42.4 mg, 0.2 mmol) and DABCO (22.4mg, 0.2 mmol). **7n** was purified by column chromatography (PE/EtOAc = 3:1) on silica gel and obtained as a white solid (27.8 mg 45% yield);  $M_p$  = 145.5-146.5 °C;  $R_f$  = 0.20 (PE/EtOAc = 2:1);  $^1H$  NMR (500 MHz,  $CDCl_3$ )  $\delta$  7.81 (s, 1H), 7.46–7.43 (m, 1H), 7.00 (d,  $J$  = 7.9 Hz, 1H), 6.97 (dd,  $J$  = 8.6, 2.5 Hz, 1H), 6.90 (d,  $J$  = 8.6 Hz, 1H), 6.61 (d,  $J$  = 2.5 Hz, 1H), 3.72 (s, 3H), 3.28 (s, 3H), 2.49 (s, 3H) ppm;  $^{13}C$  NMR (126 MHz,  $CDCl_3$ )  $\delta$  171.1, 169.7, 156.7, 144.3, 140.9, 137.8, 135.9, 126.1, 126.1, 121.5, 116.5, 111.7, 109.7, 84.6, 55.9, 27.0, 21.4 ppm; HRMS  $m/z$  (ESI): calcd for  $C_{18}H_{16}NO_4$   $[M + H]^+$  310.1081, found 310.1074.

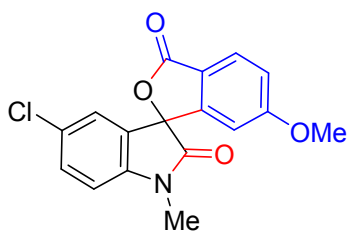

**5-chloro-6'-methoxy-1-methyl-3'H-spiro[indoline-3,1'-isobenzofuran]-2,3'-dione (7o):**

Following the general procedure **B**, **7o** was purified by PE/EtOAc (2:1) and obtained as a white solid (28.3 mg, 43% yield);  $M_p$  = 234.1-235.0 °C;  $R_f$  = 0.2 (PE/EtOAc = 2:1);  $^1H$  NMR (500 MHz,  $CDCl_3$ )  $\delta$  7.91 (d,  $J$  = 8.5 Hz, 1H), 7.43 (dd,  $J$  = 8.3, 2.0 Hz, 1H), 7.12 (dd,  $J$  = 8.6, 2.0 Hz, 1H), 7.03 (d,  $J$  = 2.0 Hz, 1H), 6.94 (d,  $J$  = 8.4 Hz, 1H), 6.48 (d,  $J$  = 1.9 Hz, 1H), 3.82 (s, 3H), 3.30 (s, 3H) ppm.  $^{13}C$  NMR (126 MHz,  $CDCl_3$ )  $\delta$  170.9, 168.8, 165.4, 148.9, 143.1, 131.5, 129.3, 127.8, 126.7, 125.7, 118.0, 118.0, 110.2, 105.7, 83.3, 56.0, 27.2 ppm; HRMS  $m/z$  (ESI): calcd for  $C_{17}H_{12}ClNO_4$   $[M + H]^+$  330.0529, found 330.0528.

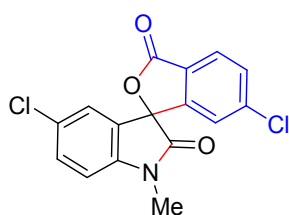

**5,6'-dichloro-1-methyl-3'H-spiro[indoline-3,1'-isobenzofuran]-2,3'-dione (7p):**

Following the general procedure **B**, with the addition of anhydrous Potassium phosphate (42.4 mg, 0.2 mmol) and DABCO (22.4mg, 0.2 mmol). **7p** was purified by column chromatography (PE/EtOAc = 3:1) on silica gel and obtained as a white solid (35.3 mg, 53% yield);  $M_p$  = 238.9-239.9 °C;  $R_f$  = 0.21 (PE/EtOAc = 3:1);  $^1H$  NMR (500 MHz,  $CDCl_3$ )  $\delta$  7.96 (d,  $J$  = 8.2 Hz, 1H), 7.61 (dd,  $J$  = 8.2, 1.7 Hz, 1H), 7.46 (dd,  $J$  = 8.4, 2.1 Hz, 1H), 7.10 (d,  $J$  = 1.3 Hz, 1H), 7.04 (d,  $J$  = 2.1 Hz, 1H), 6.96 (d,  $J$  = 8.4 Hz, 1H), 3.31 (s, 3H) ppm;  $^{13}C$  NMR (126 MHz,  $CDCl_3$ )  $\delta$  170.2, 167.9, 147.7, 141.8, 131.9, 131.4, 129.5, 127.4, 125.7, 125.7, 124.3, 122.3, 110.4, 83.3, 27.2 ppm; HRMS  $m/z$  (ESI): calcd for  $C_{16}H_9Cl_2NO_3$   $[M + H]^+$  334.0034, found 334.0032.

## 4.Reaction intermediates confirmation

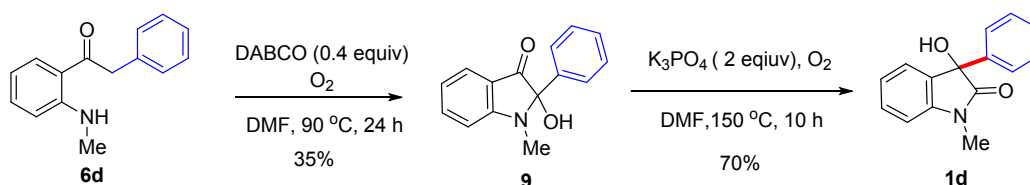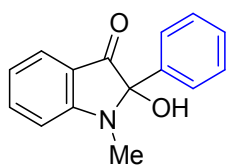

### 2-hydroxy-1-methyl-2-phenylindolin-3-one (9):

In a 10 mL microwave tube was charged with 1-(2-(methylamino)phenyl)-2-phenylethanone (112.5 mg, 0.5 mmol), DABCO (22.4 mg, 0.2 mmol), and anhydrous DMF 2.0 mL. The reaction mixture was evacuated and refilled with O<sub>2</sub> for 3 times before it was stirred at 90 °C for 24 h. The reaction mixture was then cooled to rt and diluted with water (10 mL) before it was extracted with EtOAc (60 mL). The residue was purified by column chromatography (PE/EtOAc = 3:1) on silica gel to provide **9** as a yellow solid (41.8 mg, 35% yield); *M<sub>p</sub>* = 104.1–105.1 °C; *R<sub>f</sub>* = 0.21 (PE/EtOAc = 3:1); <sup>1</sup>H NMR (500 MHz, CDCl<sub>3</sub>) δ 7.58 – 7.52 (m, 2H), 7.44 – 7.40 (m, 2H), 7.36 (m, *J* = 7.1, 4.6, 2.4 Hz, 3H), 6.82 – 6.73 (m, 2H), 2.86 (s, 3H) ppm. <sup>13</sup>C NMR (126 MHz, CDCl<sub>3</sub>) δ 199.88, 161.16, 138.85, 135.83, 128.89, 128.85, 126.11, 126.10, 118.14, 117.26, 107.95, 90.90, 27.53 ppm. The spectra data are matched with those reported.<sup>8</sup>

In a 10 mL microwave tube was charged with 2-hydroxy-1-methyl-2-phenylindolin-3-one (**9**) (23.9 mg, 0.1 mmol), K<sub>3</sub>PO<sub>4</sub> (42.4 mg, 0.2 mmol) and anhydrous DMF 0.5 mL. The reaction mixture was evacuated and refilled with O<sub>2</sub> for 3 times before it was stirred at 150 °C for 10 h. The reaction mixture was then cooled to rt and diluted with water (10 mL) before it was extracted with EtOAc (60 mL). The residue was purified by column chromatography (PE/EtOAc = 3:1) on silica gel to provide **1d** as a yellow solid (17.7 mg, 70% yield).

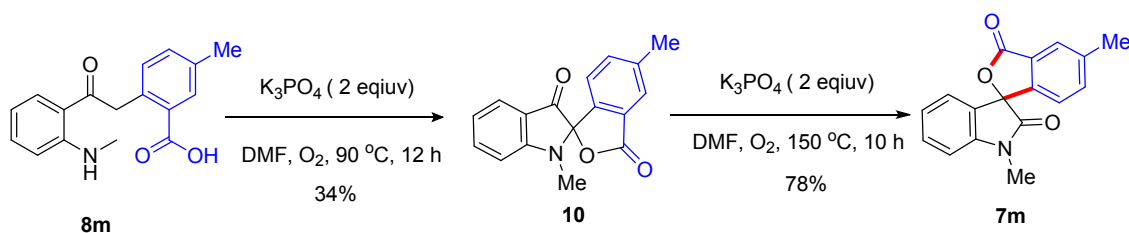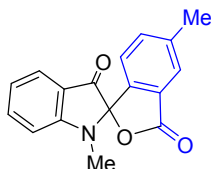

### 1,5'-dimethyl-3'H-spiro[indoline-2,1'-isobenzofuran]-3,3'-dione (10):

In a 10 mL microwave tube was charged with 5-methyl-2-(2-(2-(methylamino)phenyl)-2-oxoethyl)benzoic acid (**8m**) (141.5 mg, 0.5 mmol), anhydrous Potassium phosphate (212 mg, 1.0 mmol), and anhydrous DMF 2.5 mL. The reaction mixture was evacuated and refilled with O<sub>2</sub> for 3 times before it was stirred at 90 °C for 12 h. The reaction mixture was then cooled to rt and diluted with water (10 mL) before it was extracted with EtOAc (60 mL). The residue was purified by column chromatography (PE/EtOAc = 3:1) on silica gel to provide **10** as a yellow solid (47.4 mg, 34% yield). *M<sub>p</sub>* = 113.5–114.9 °C; <sup>1</sup>H NMR (500 MHz, CDCl<sub>3</sub>) δ 7.81 (s, 1H), 7.64 (d, *J* = 7.6 Hz, 1H), 7.63 – 7.58 (m, 1H), 7.51 (dd, *J* = 7.8, 0.7 Hz, 1H),

7.19 (d,  $J = 7.8$  Hz, 1H), 6.91 (t,  $J = 7.5$  Hz, 1H), 6.86 (d,  $J = 8.2$  Hz, 1H), 2.75 (s, 3H), 2.51 (s, 3H) ppm.  $^{13}\text{C}$  NMR (151 MHz,  $\text{CDCl}_3$ )  $\delta$  192.11, 167.36, 160.11, 140.87, 138.46, 137.94, 134.85, 127.74, 125.15, 124.93, 120.98, 118.49, 117.30, 107.94, 95.50, 76.24, 76.03, 75.81, 26.68, 20.41 ppm. HRMS  $m/z$  (EI): calcd for  $\text{C}_{17}\text{H}_{13}\text{NO}_3$  [M] 279.0895, found 279.0906.

In a 10 mL microwave tube was charged with 1,5'-dimethyl-3'H-spiro[indoline-2,1'-isobenzofuran]-3,3'-dione (**10**) (27.9 mg, 0.1 mmol), anhydrous Potassium phosphate (42.4 mg, 0.2 mmol), and anhydrous DMF 0.5 mL. The reaction mixture was evacuated and refilled with  $\text{O}_2$  for 3 times before it was stirred at 150 °C for 10 h. The reaction mixture was then cooled to rt and diluted with water (10 mL) before it was extracted with EtOAc (60 mL). The residue was purified by column chromatography (PE/EtOAc = 3:1) on silica gel to provide **7m** as a yellow solid (21.8 mg, 78% yield).

## 5. Reactions in the presence of TEMPO

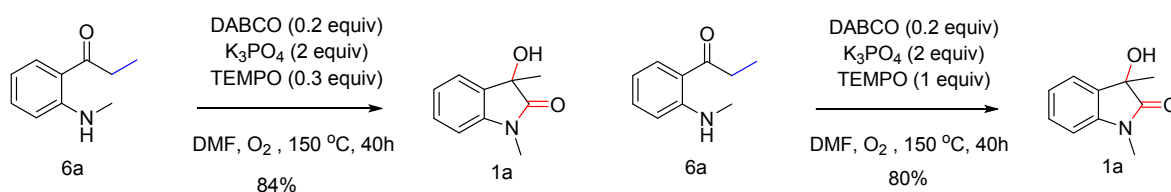

Following the general procedure A, with the addition of either 0.3 equiv of TEMPO (9.3 mg, 0.06 mmol) or 1.0 equiv of TEMPO (31.2 mg, 0.2 mmol), then the reactions were stirred at 150 °C for 40 hours, which afforded the product **1a** in 84% yield (29.9 mg) and 80% yield (28.5 mg), respectively.

Reference:

1. K. Okuma, S. Ozaki. *Heterocycles*. 2010, **81**, 935.
2. Y. Zhu, M. M. Alam, and S. A. Jenekhe. *Macromolecules*. 2003, **36**, 8958-8968.
3. R. M. Letcher, N. C. Kwok. *J. Chem. Soc., Perkin Trans. 1*. 1998, 1715-1720.
4. J. P. Zhu. *Org. Biomol. Chem.* 2013, **11**, 1533-1536.
5. A. D. Smith. *Synthesis*. 2008, **17**, 2805-2818.
6. P. J. Jones, E. C. Merrick. *J Pharmacol. Exp. Ther.* 2009, **328**, 201-212.
7. J. L. Zhang, J. X. Chen. *Tetrahedron*. 2011, **67**, 9347-9351.
8. K. Q. Ling. *Chin. J. Chem.* 1996, **14**, 265-270.

## 6. NMR spectra of all the indolin-2-one

### 3-hydroxy-1,3-dimethylindolin-2-one (**1a**)

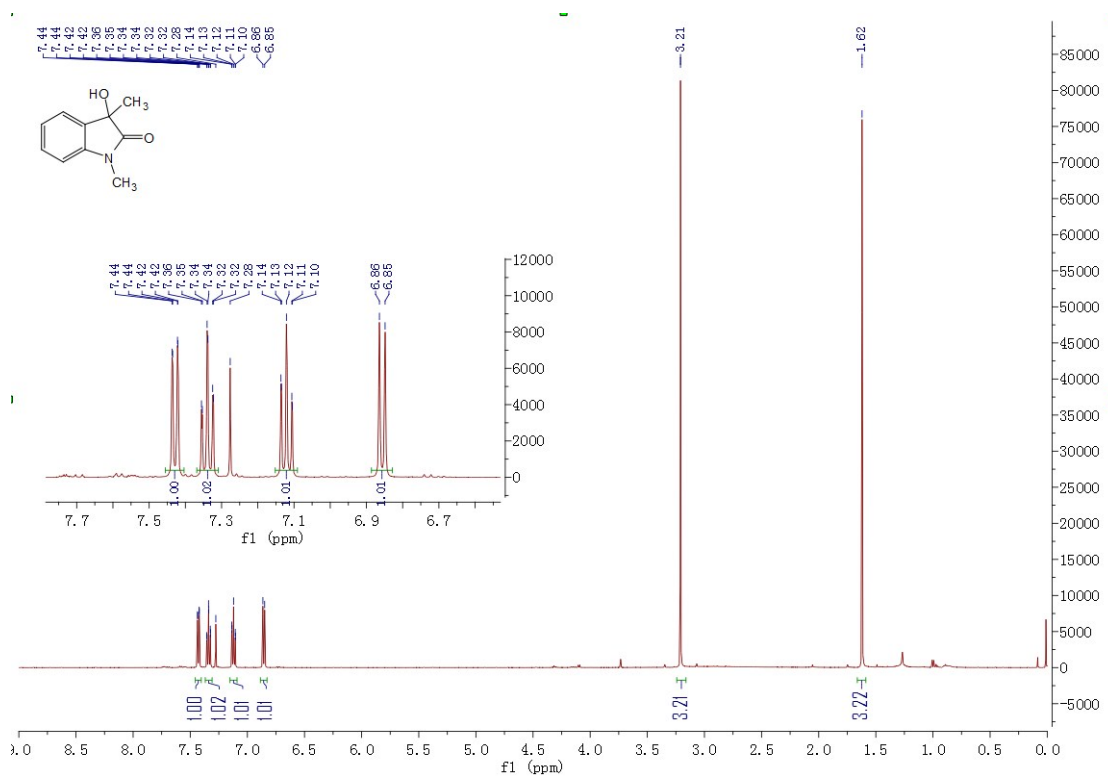

### 1-benzyl-3-hydroxy-3-methylindolin-2-one (1b)

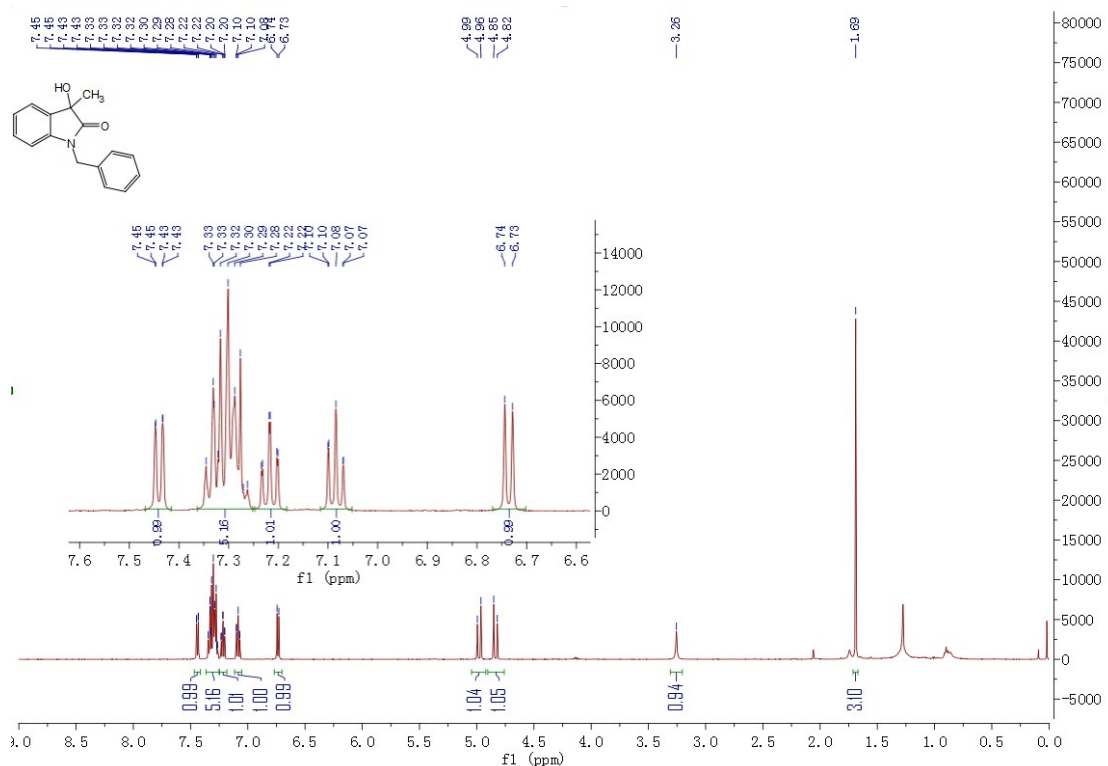

### 1-benzyl-3-ethyl-3-hydroxy-6-methylindolin-2-one (1c)

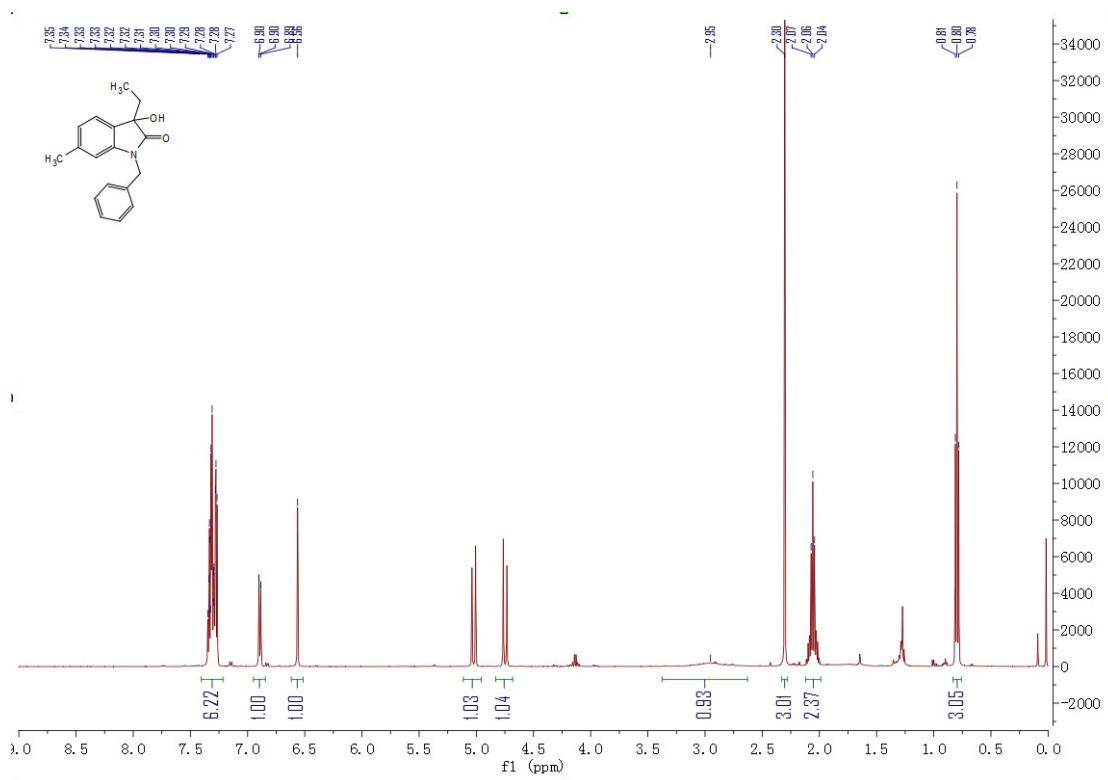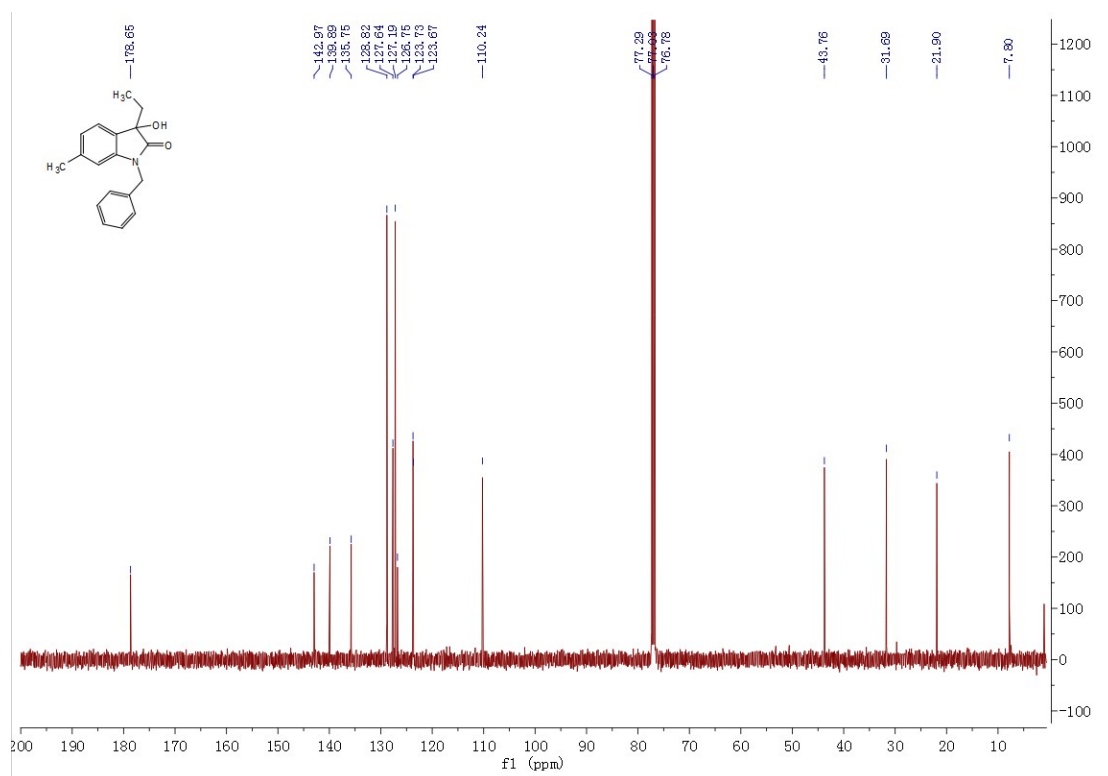

**3-hydroxy-1-methyl-3-phenylindolin-2-one (1d)**

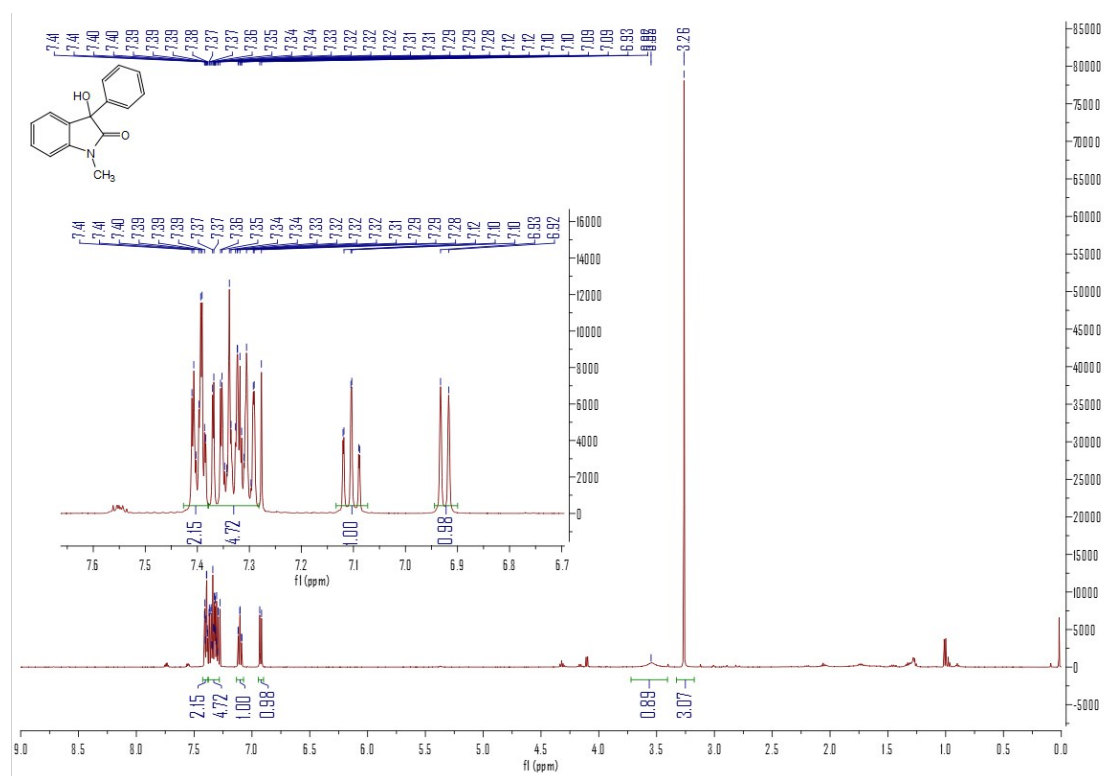

### 3-hydroxy-1,5-dimethyl-3-phenylindolin-2-one (1e)

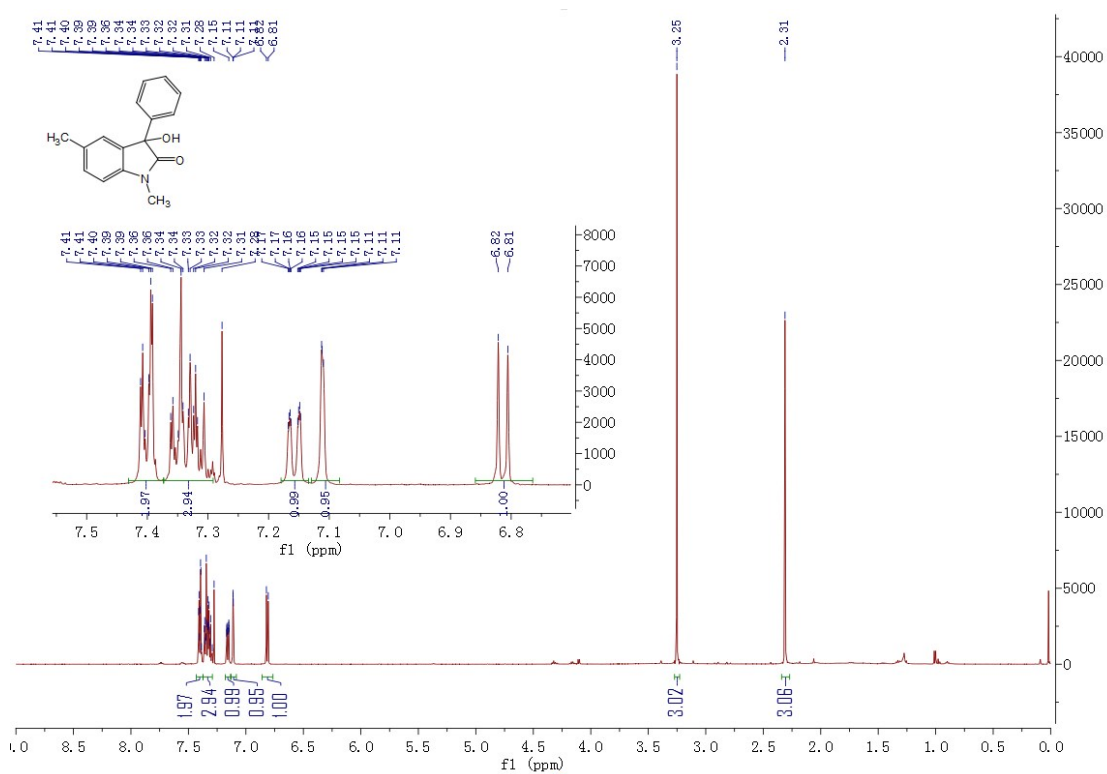

### 3-hydroxy-3-(4-methoxyphenyl)-1-methylindolin-2-one (1f)

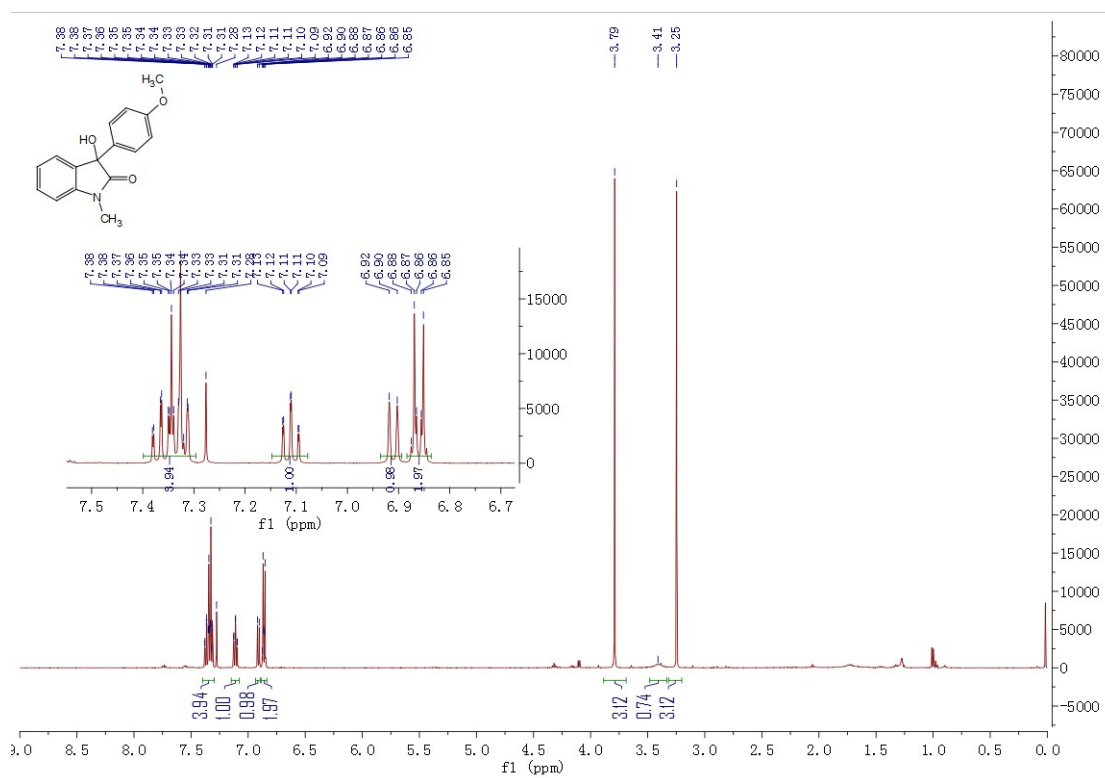

### 5-fluoro-3-hydroxy-1-methyl-3-phenylindolin-2-one (1g)

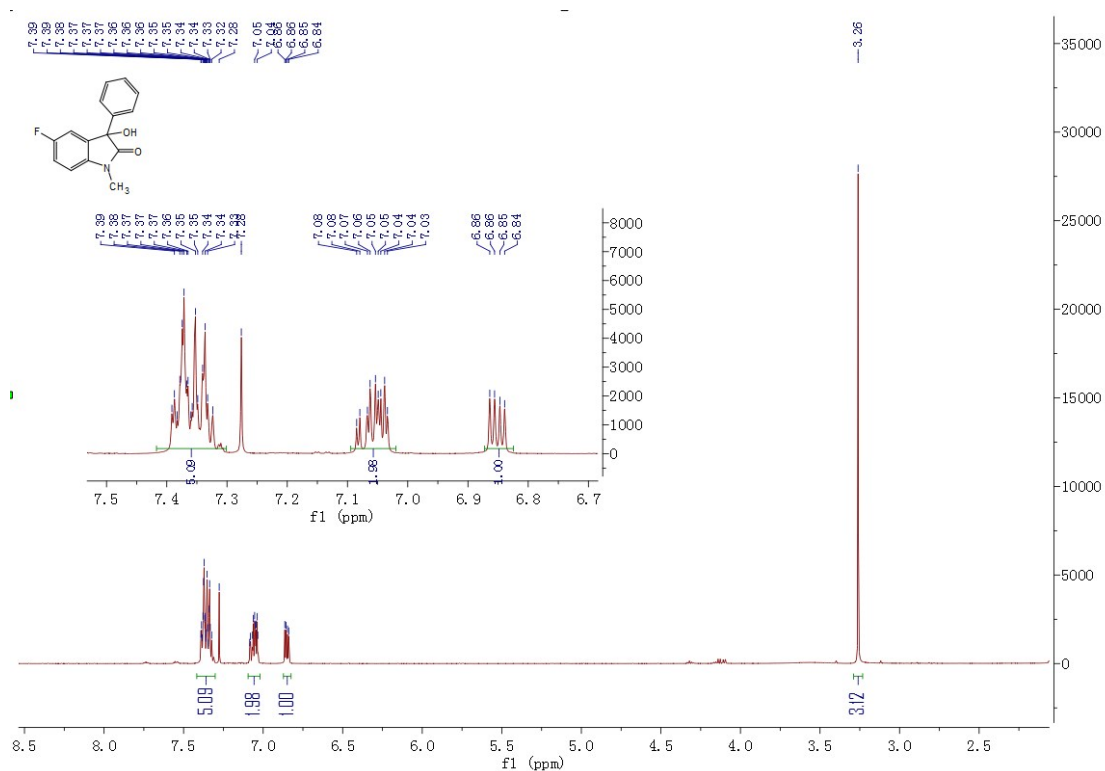

### 5-chloro-3-hydroxy-1-methyl-3-phenylindolin-2-one (1h)



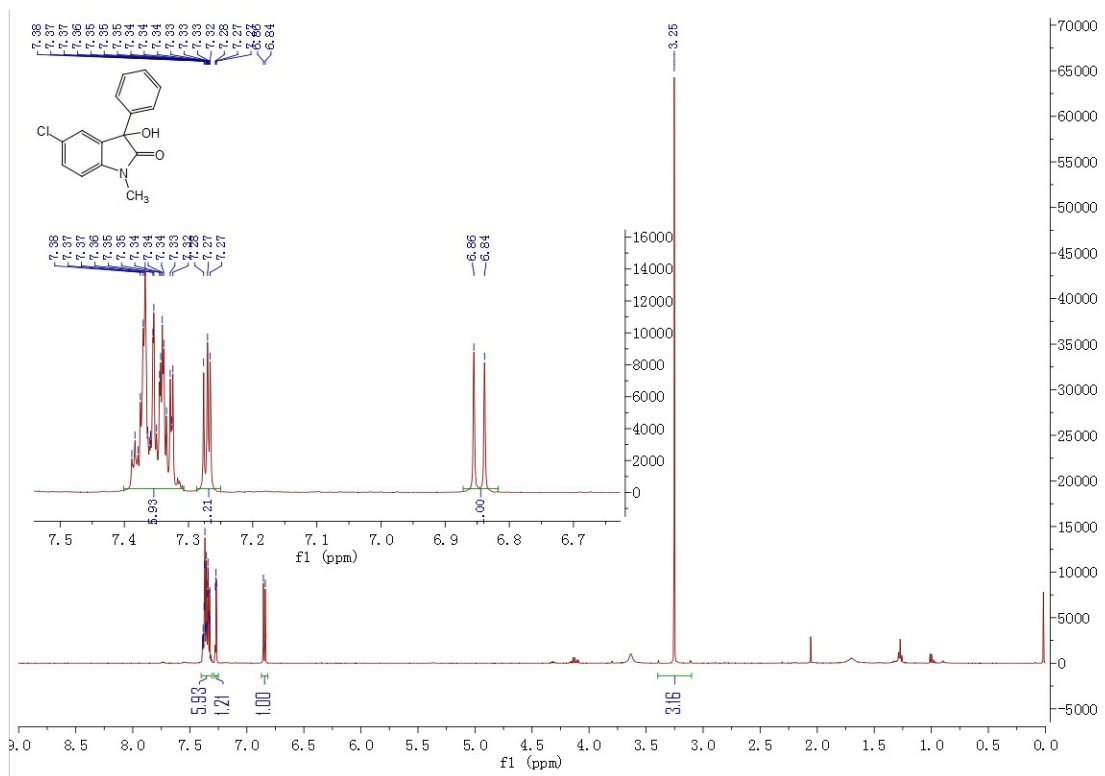

**1-benzyl-3-hydroxy-3-phenylindolin-2-one (1i)**

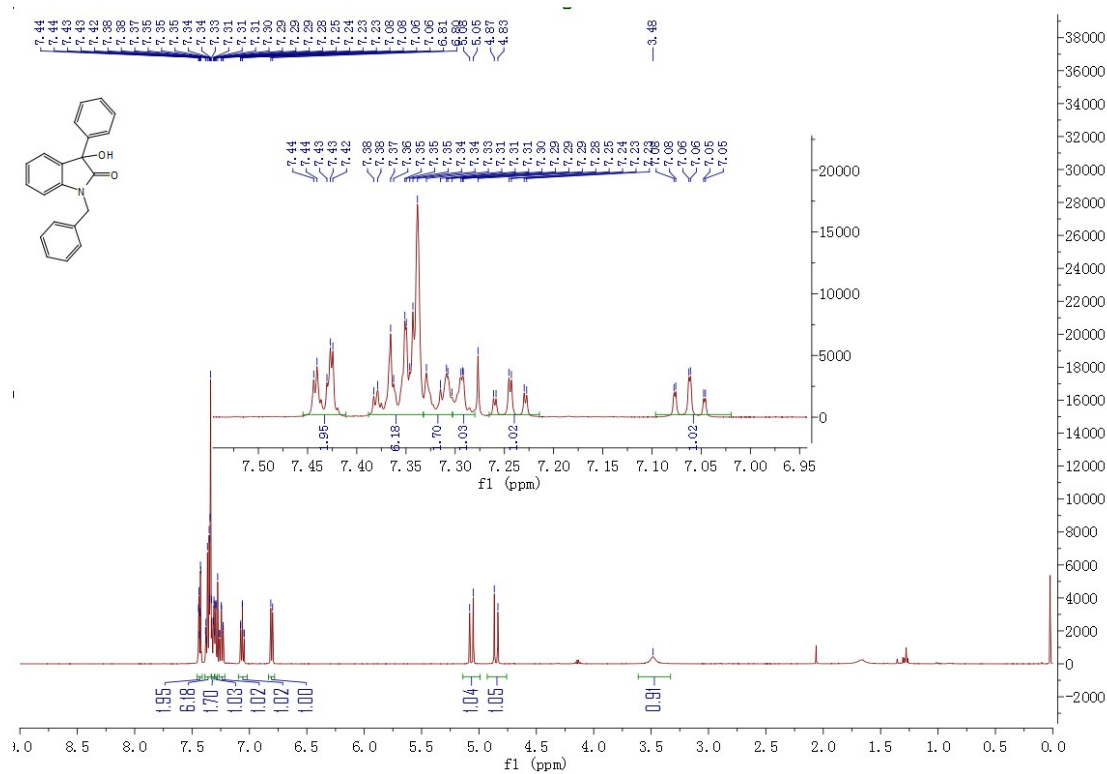

**1-benzyl-3-hydroxy-3-(4-propylphenyl)indolin-2-one (1j)**

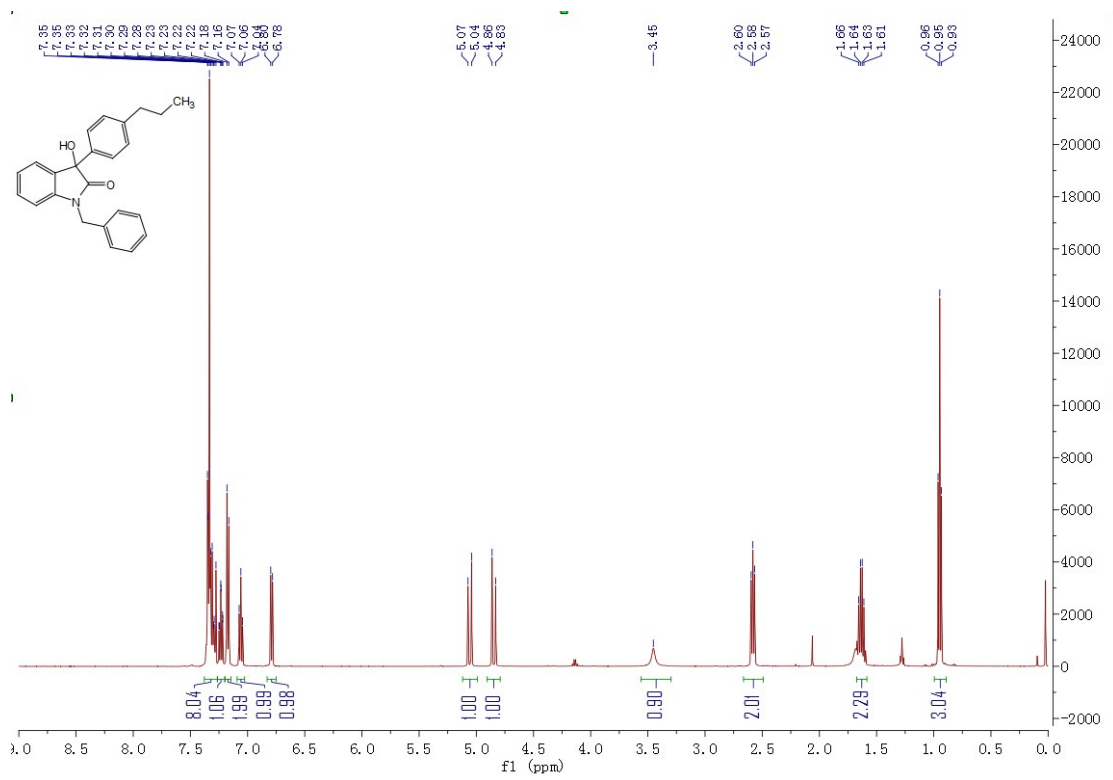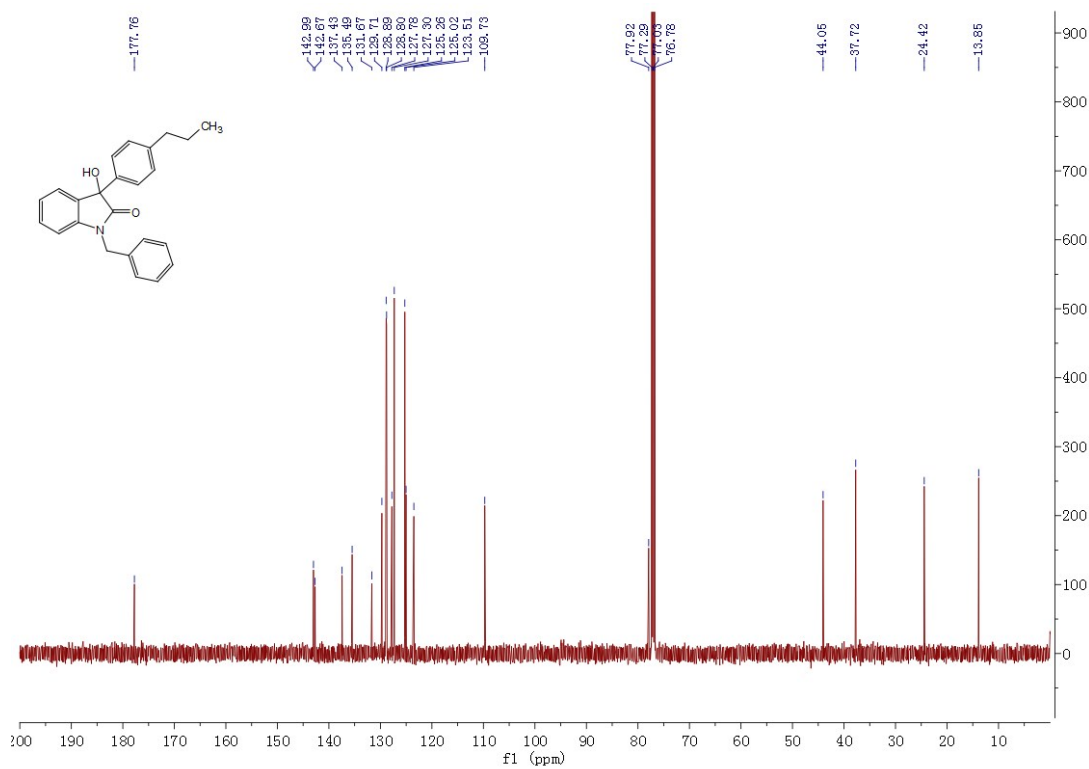

**1-benzyl-3-(3-fluorophenyl)-3-hydroxyindolin-2-one (1k)**

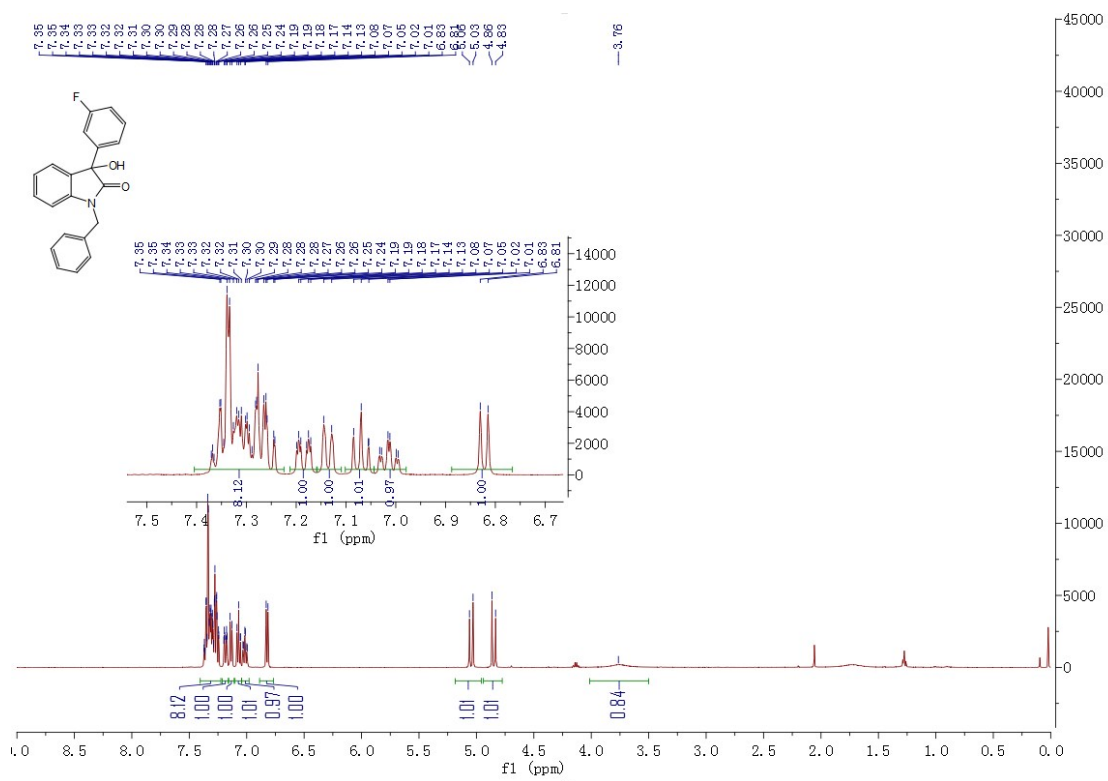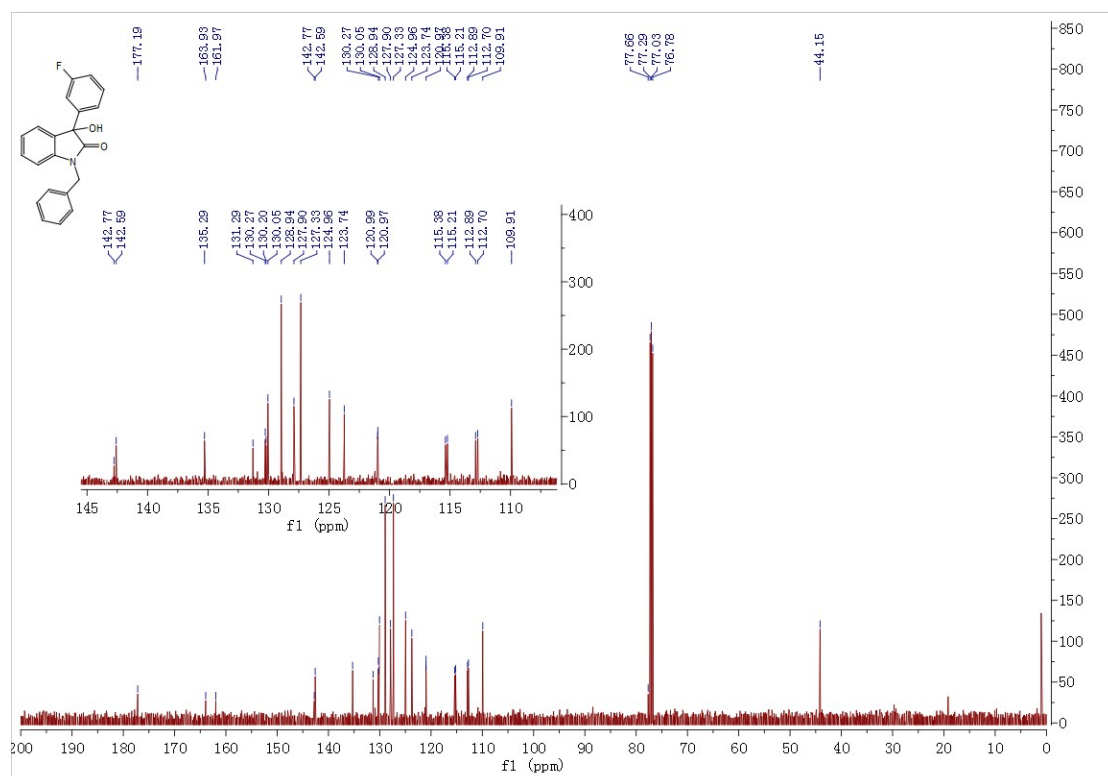

**1-methyl-3'H-spiro[indoline-3,1'-isobenzofuran]-2,3'-dione (7a)**

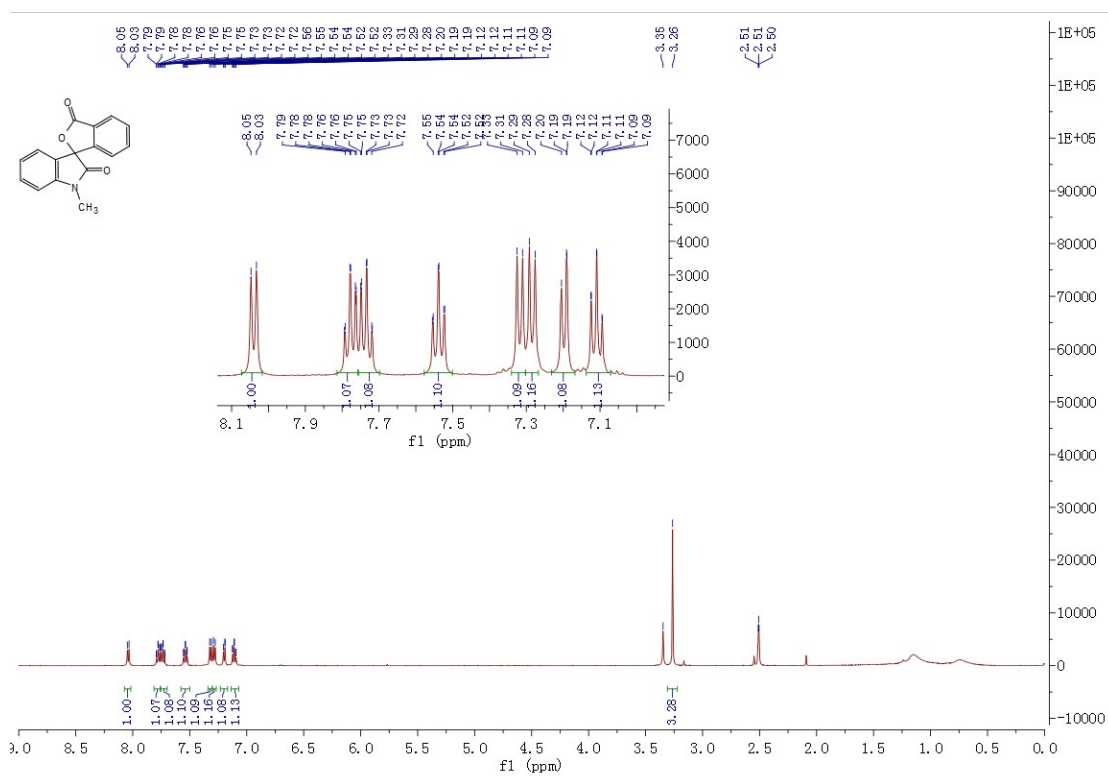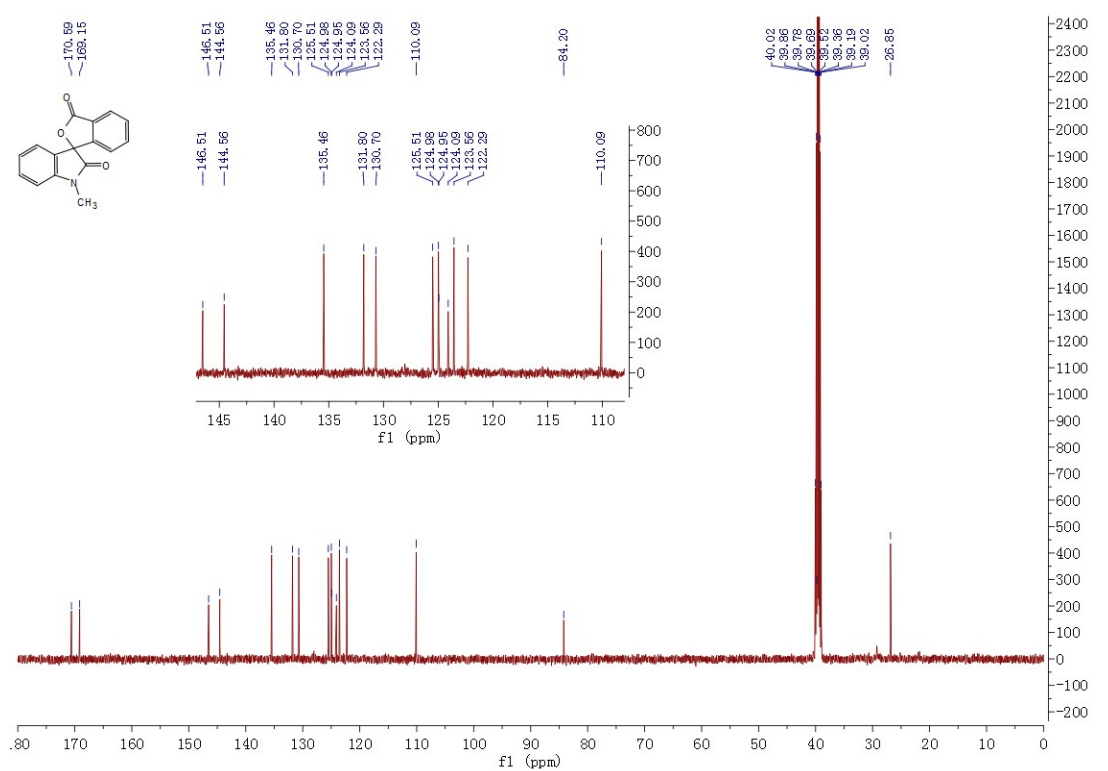

**1,6-dimethyl-3'H-spiro[indoline-3,1'-isobenzofuran]-2,3'-dione (7b)**

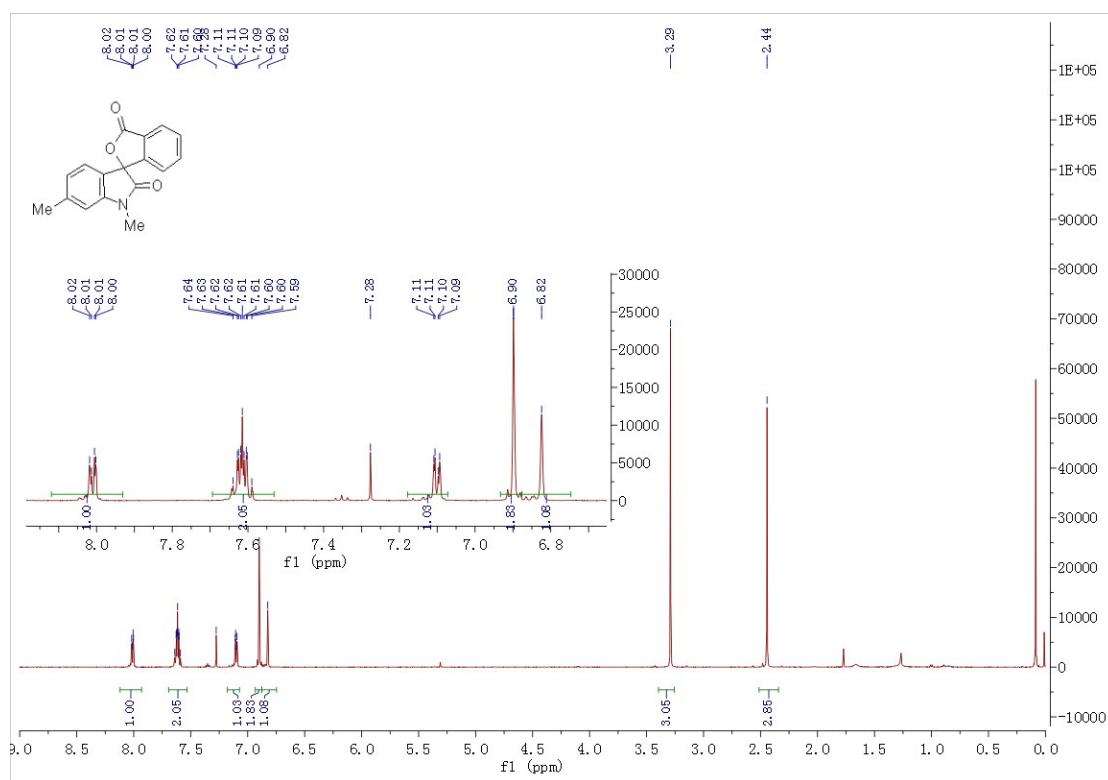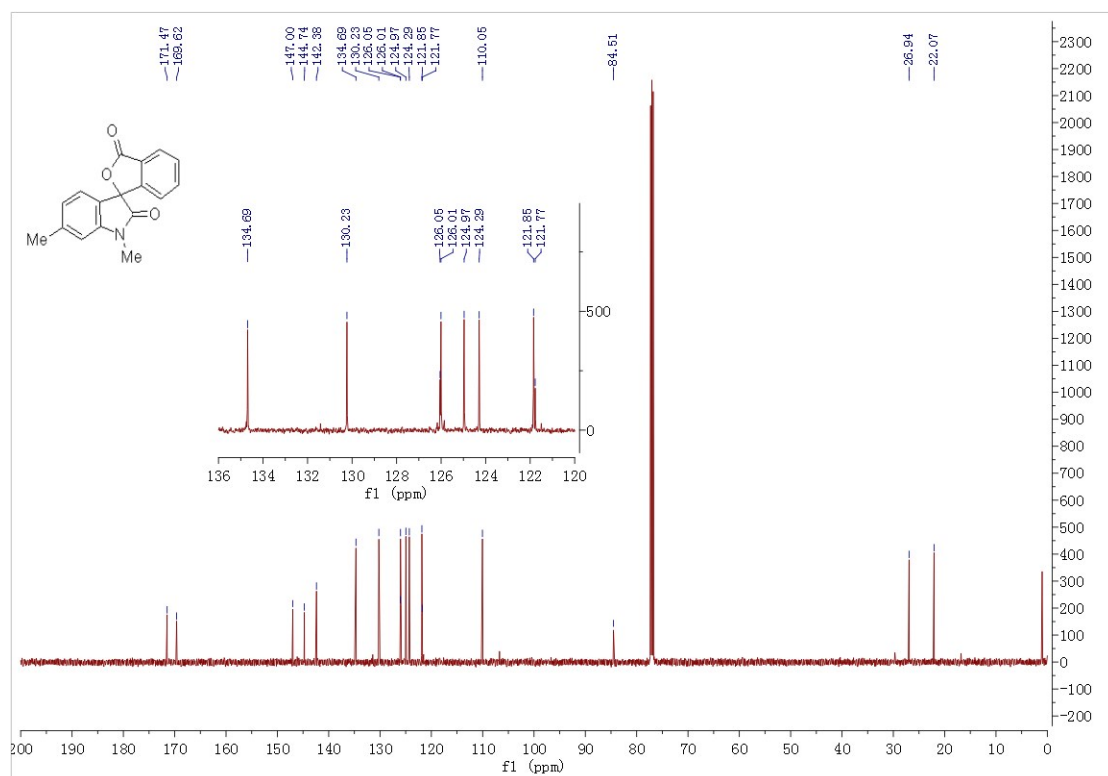

**1,5,6-trimethyl-3'H-spiro(indoline-3,1'-isobenzofuran)-2,3'-dione (7c)**

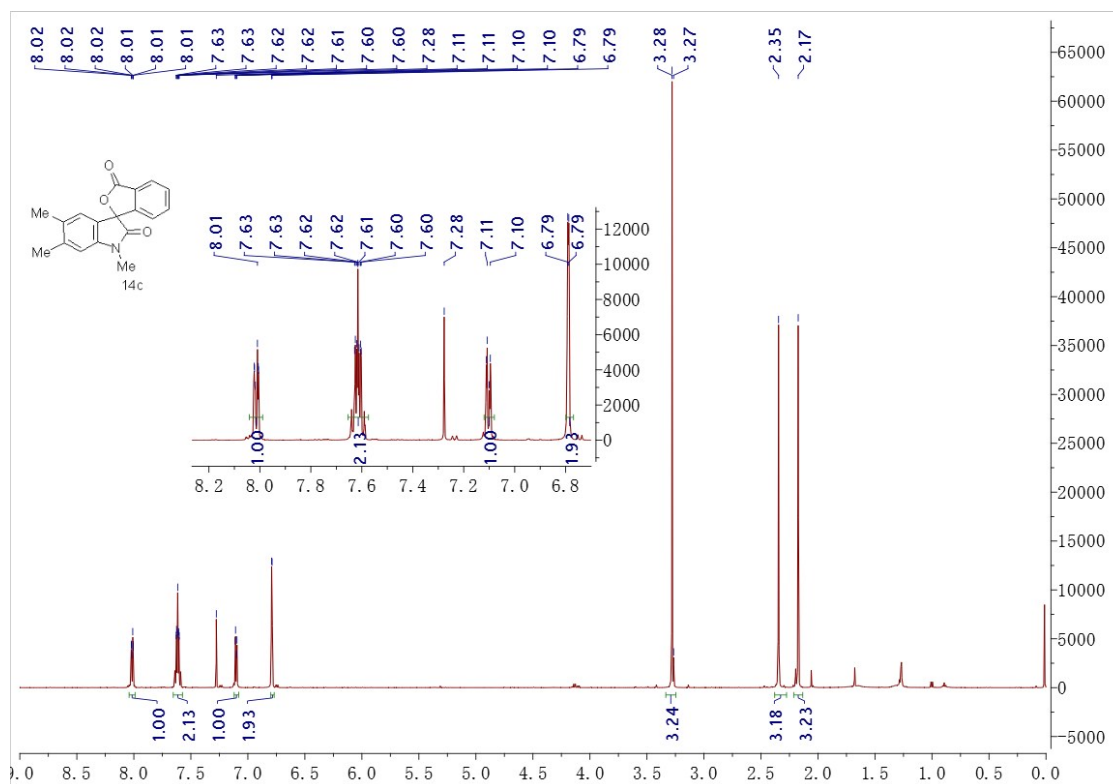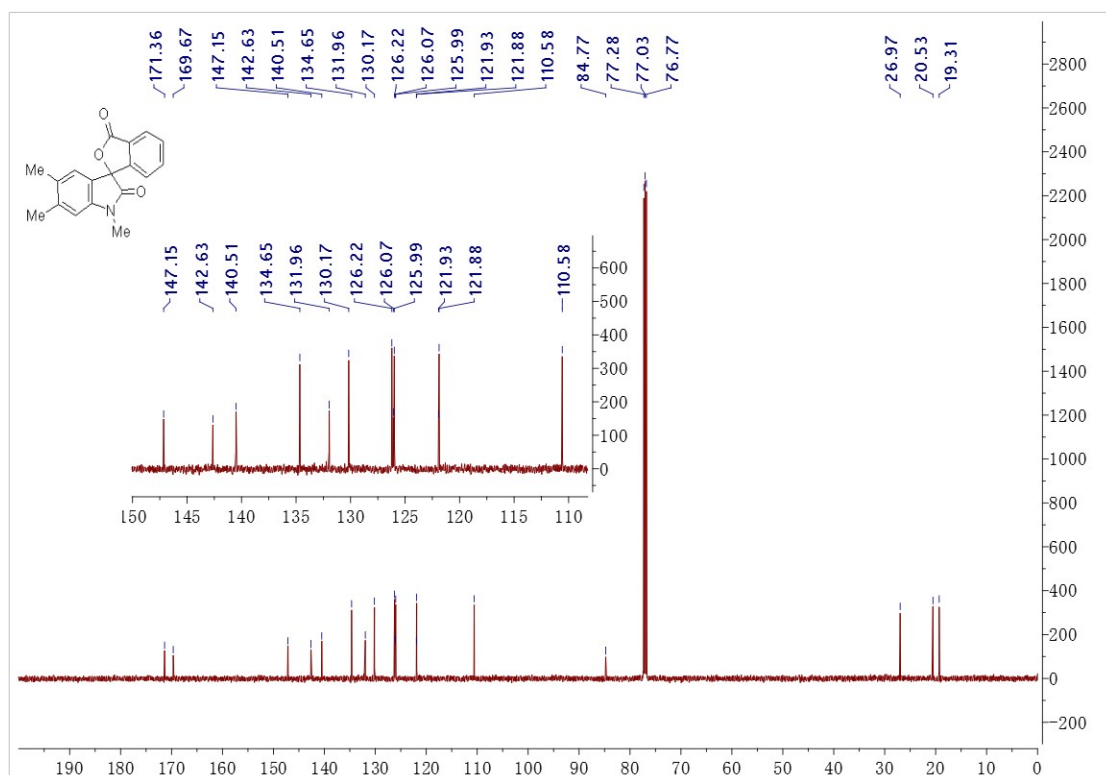

**5-methoxy-1-methyl-3'H-spiro[indoline-3,1'-isobenzofuran]-2,3'-dione (7d)**

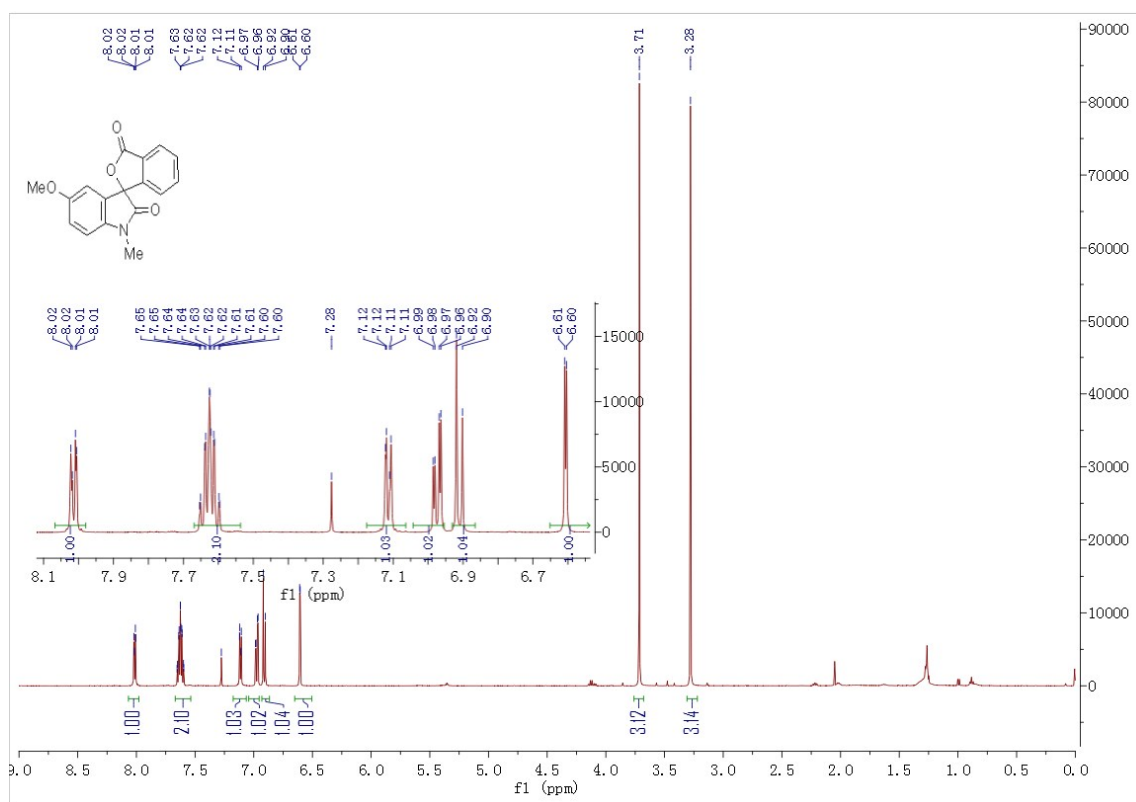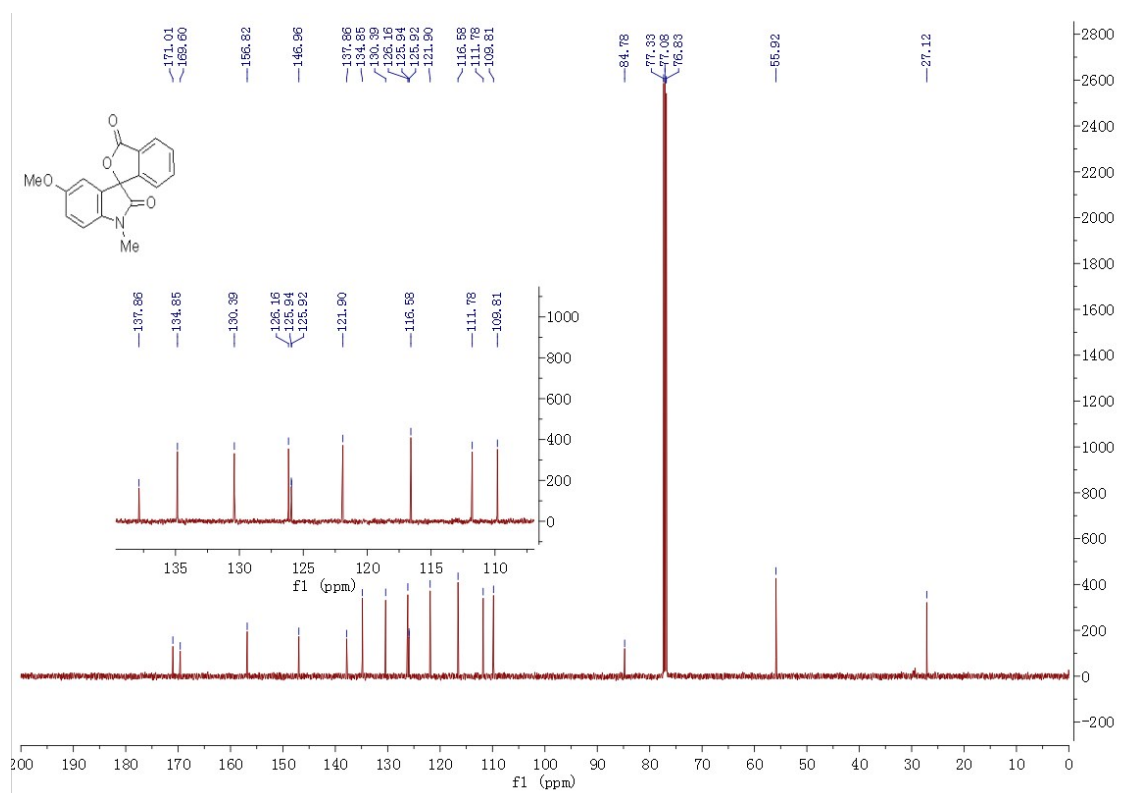

**5-fluoro-1-methyl-3'H-spiro[indoline-3,1'-isobenzofuran]-2,3'-dione (7e)**



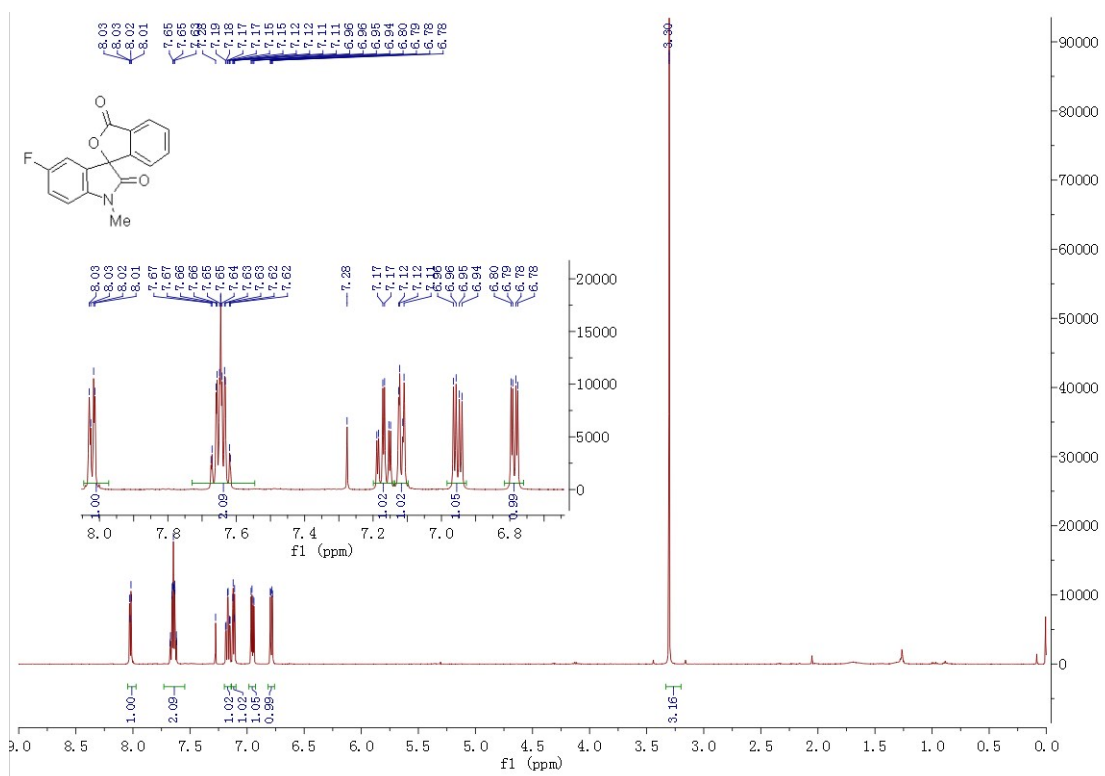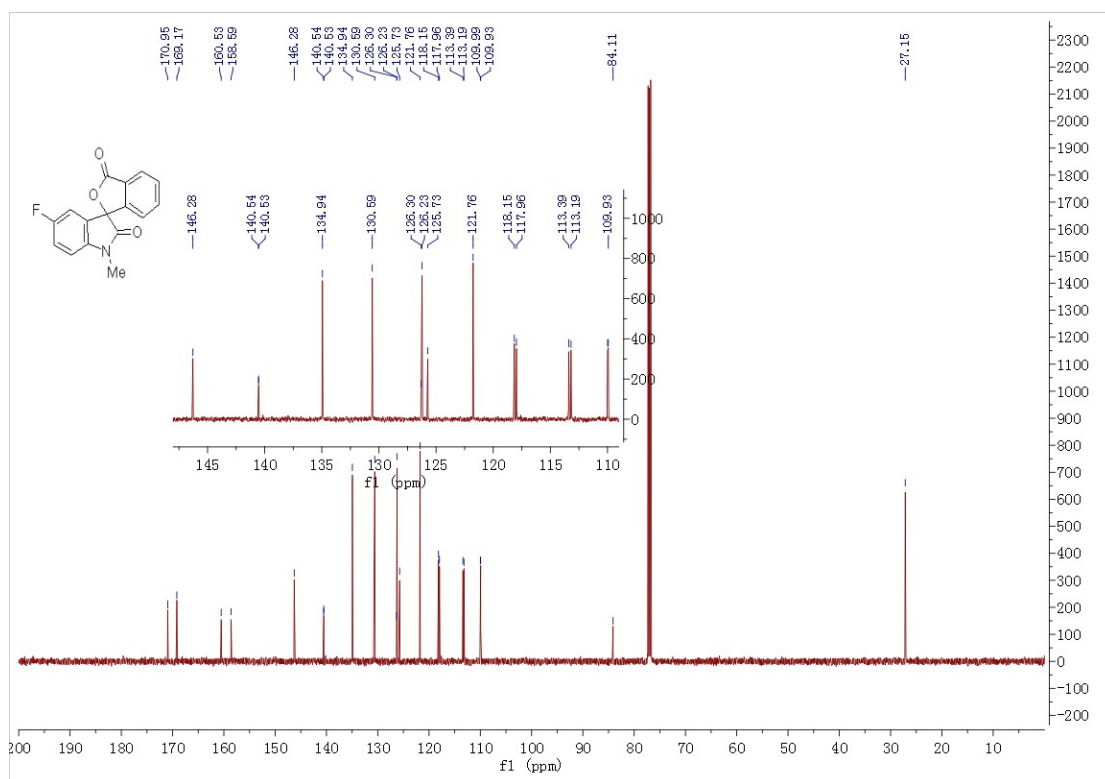

**5-chloro-1-methyl-3'-H-spiro[indoline-3,1'-isobenzofuran]-2,3'-dione (7f)**

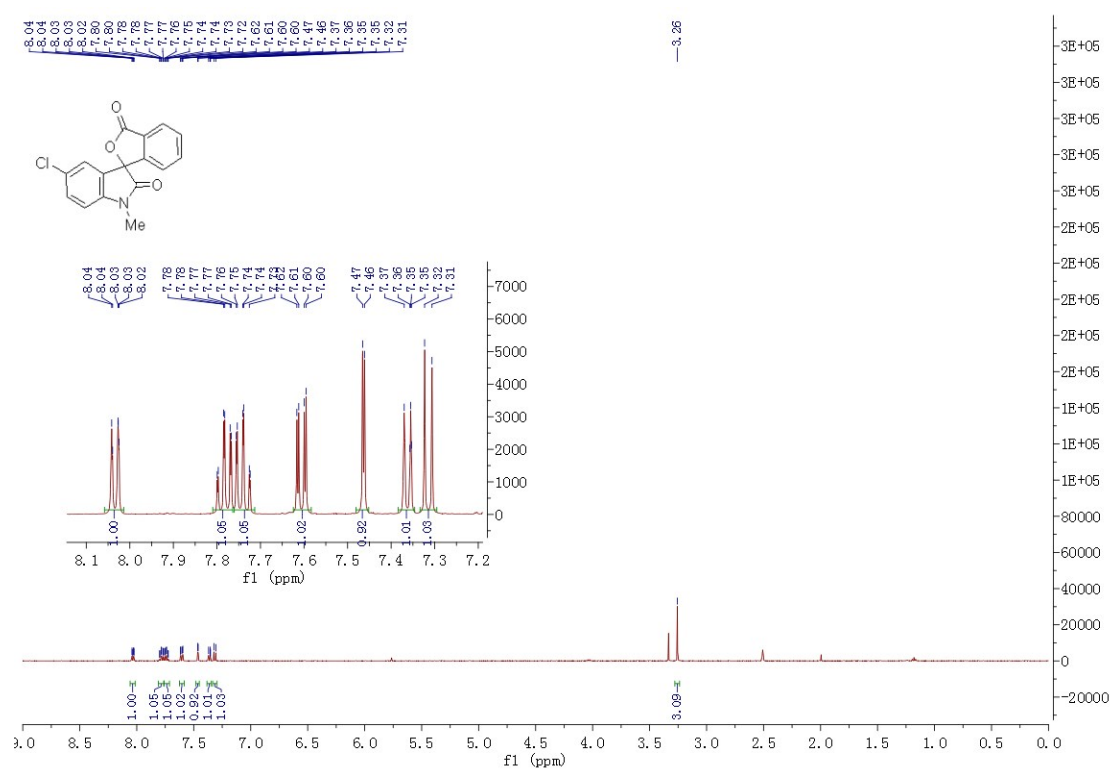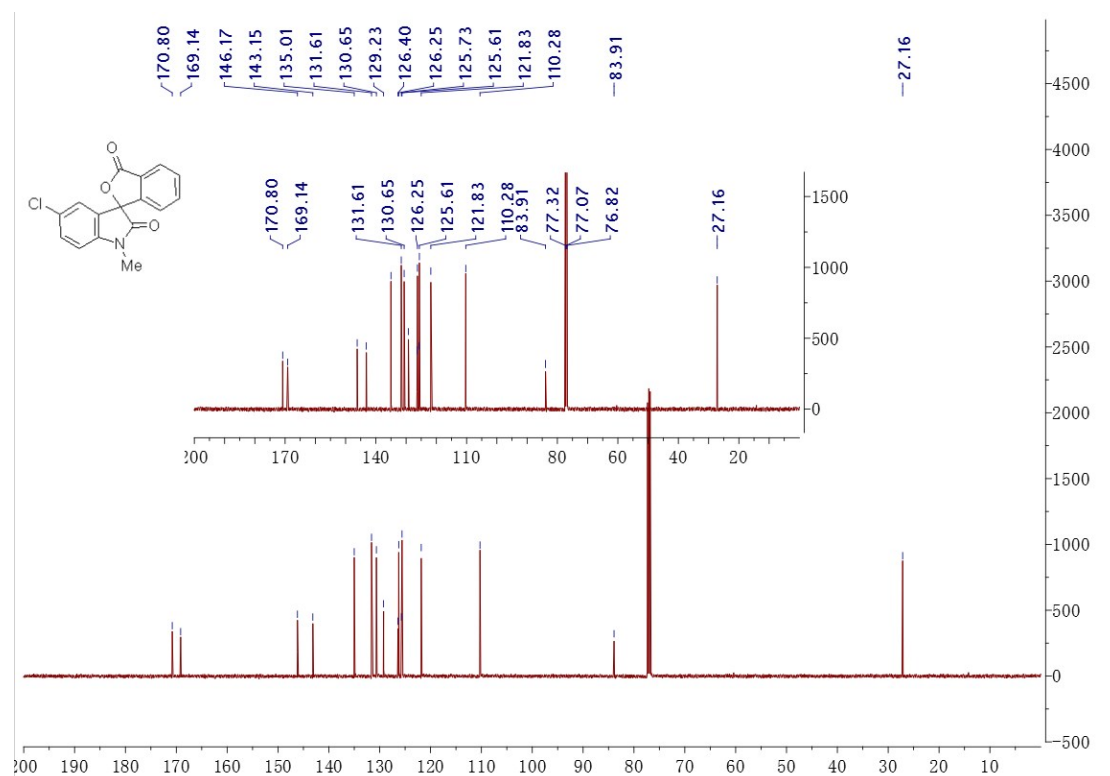

**1-methyl-5-(trifluoromethyl)-3'H-spiro[indoline-3,1'-isobenzofuran]-2,3'-dione (7g)**

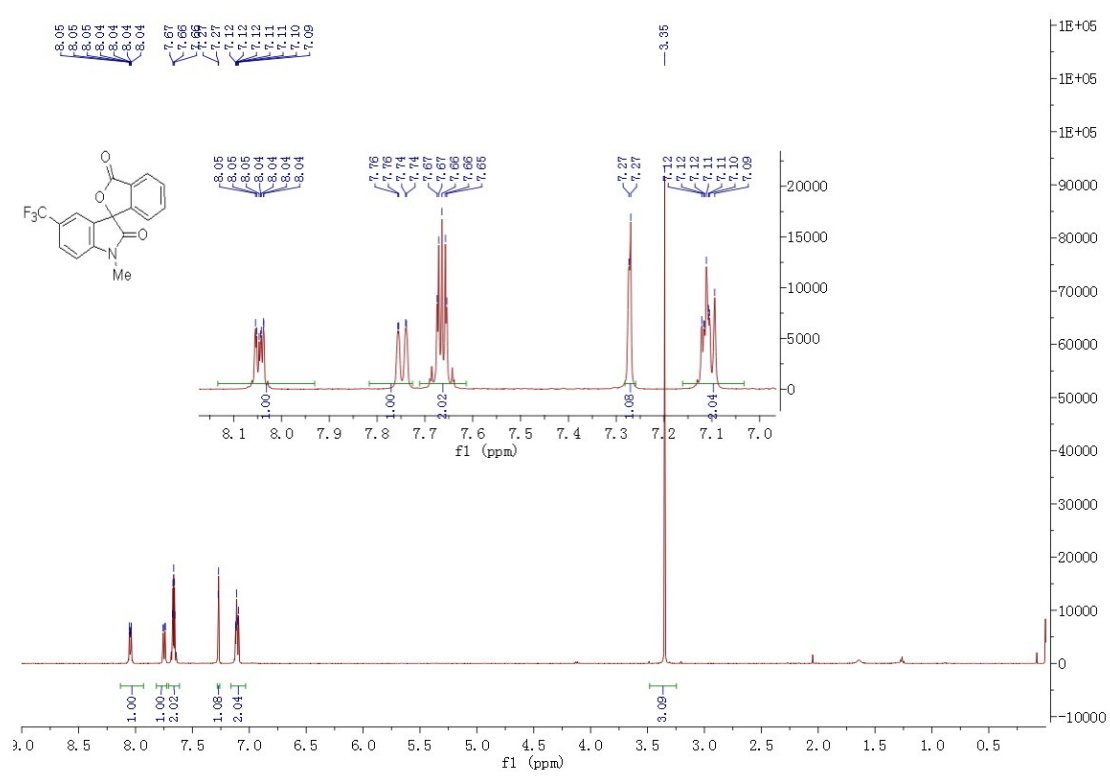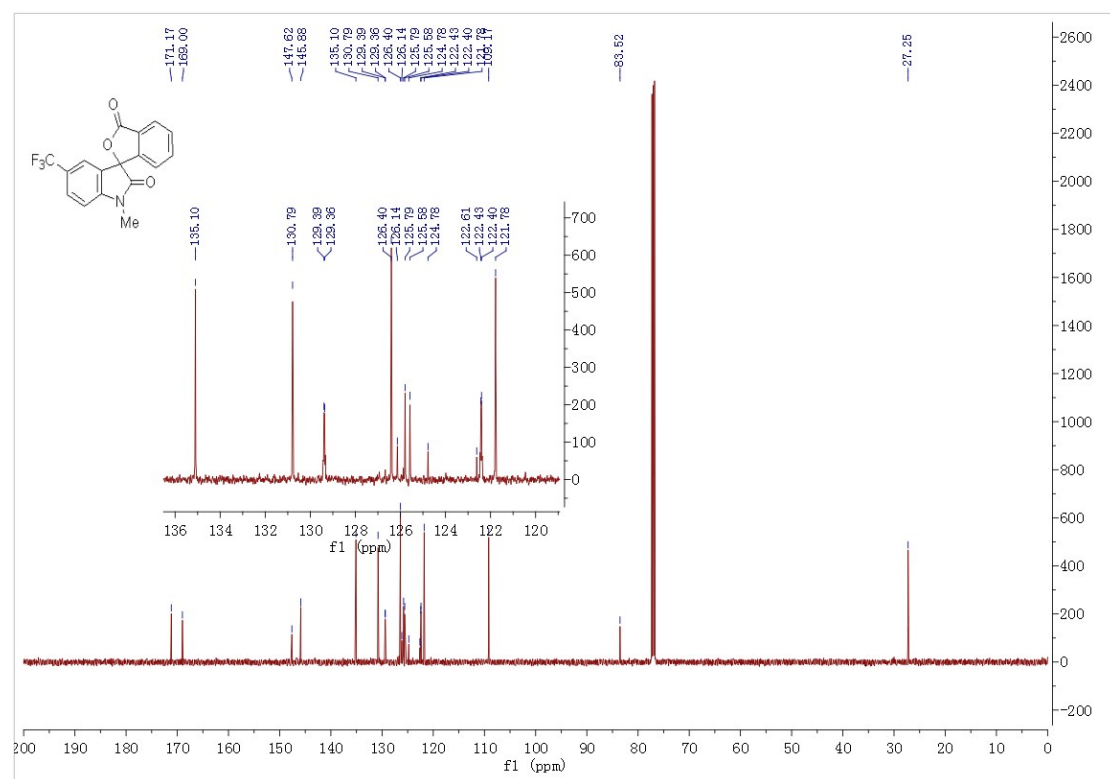

**1-benzyl-3'H-spiro[indoline-3,1'-isobenzofuran]-2,3'-dione (7h)**

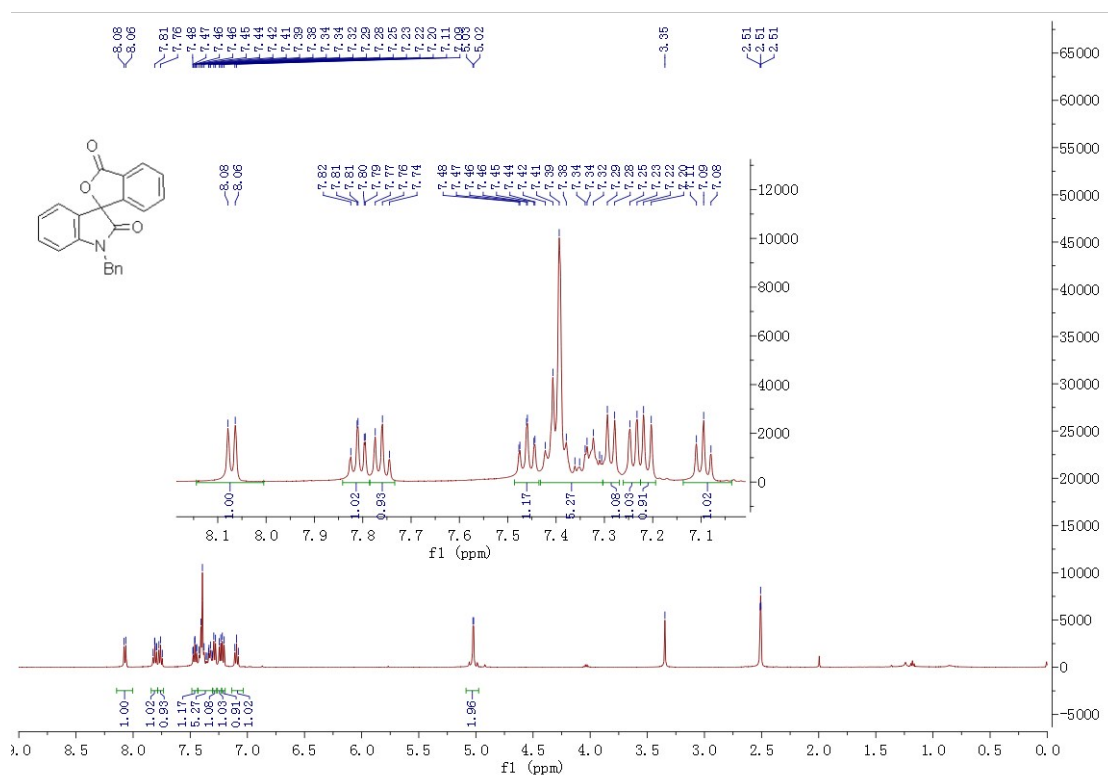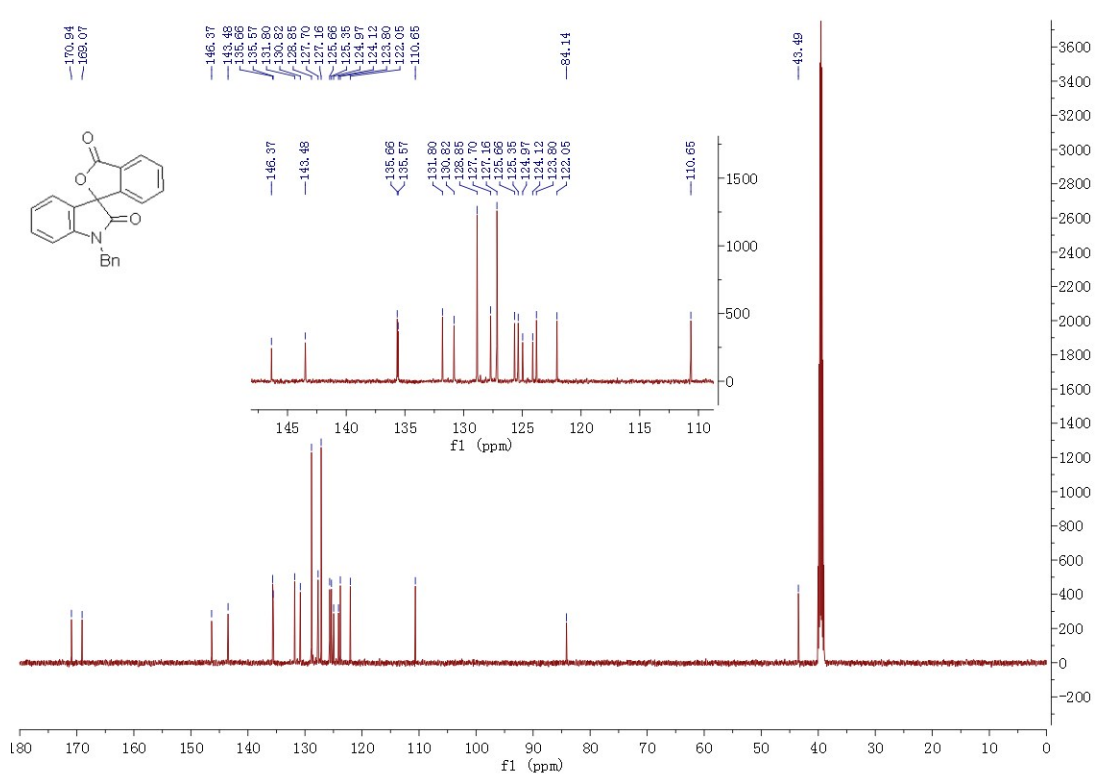

**6'-methoxy-1-methyl-3'*H*-spiro(indoline-3,1'-isobenzofuran)-2,3'-dione (7i):**

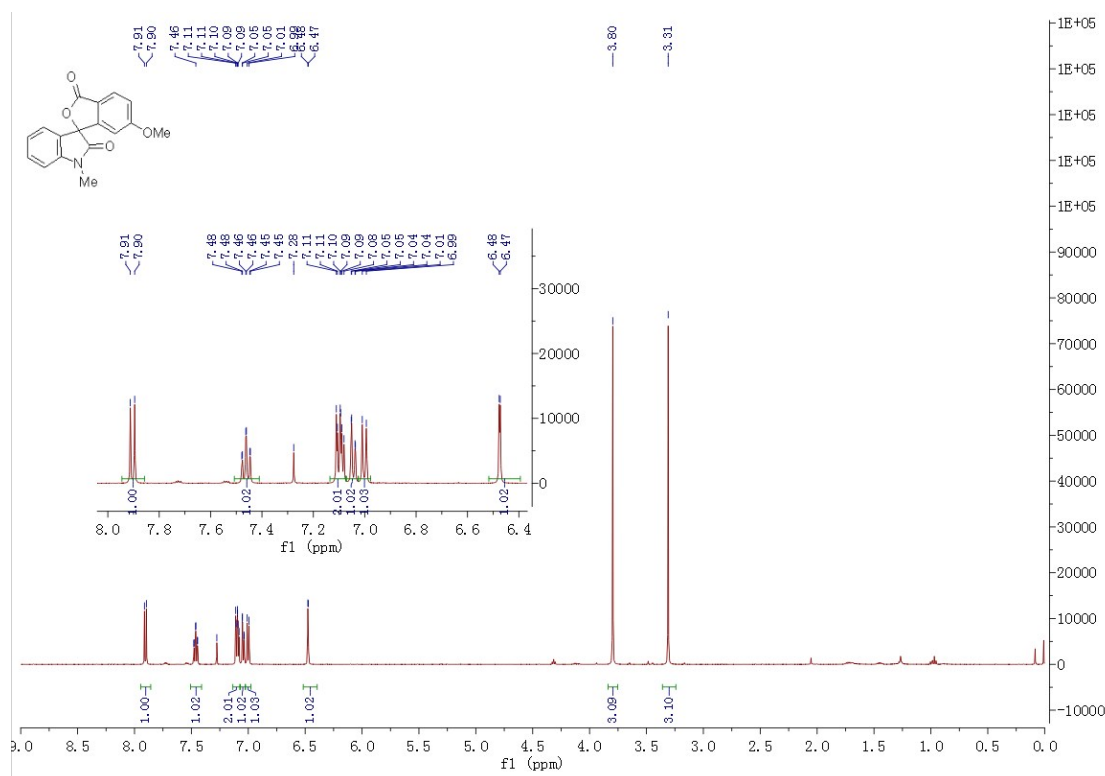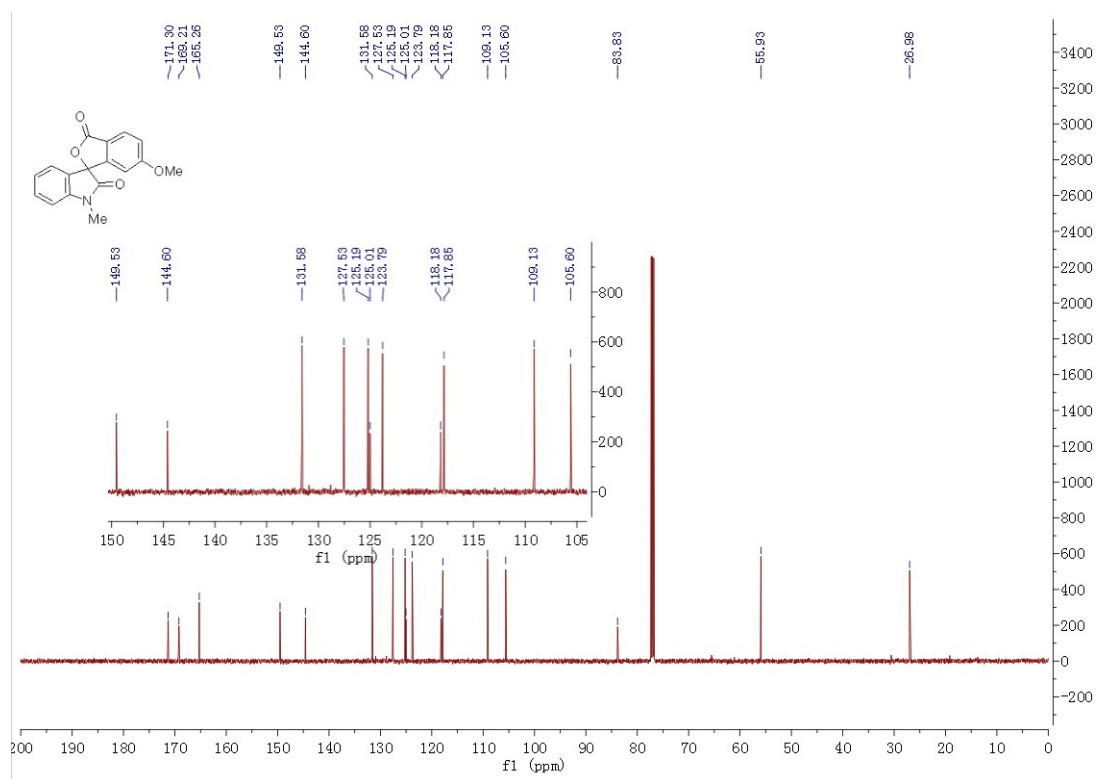

**6'-chloro-1-methyl-3'H-spiro[indoline-3,1'-isobenzofuran]-2,3'-dione (7j)**

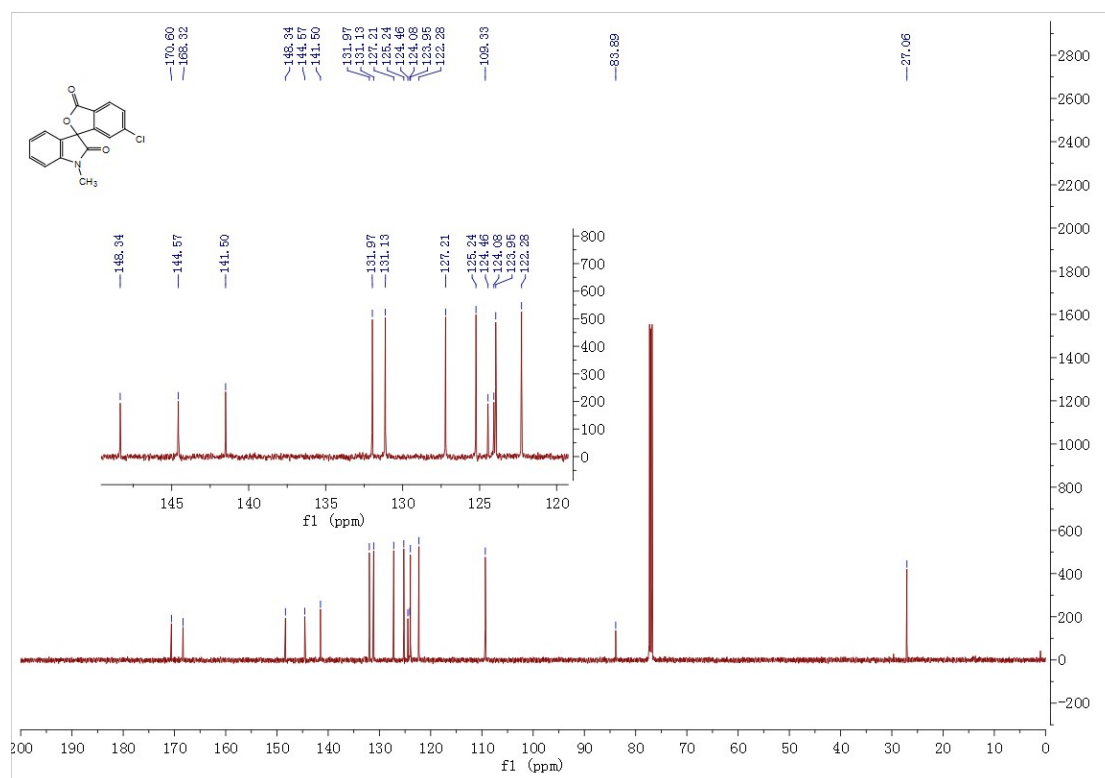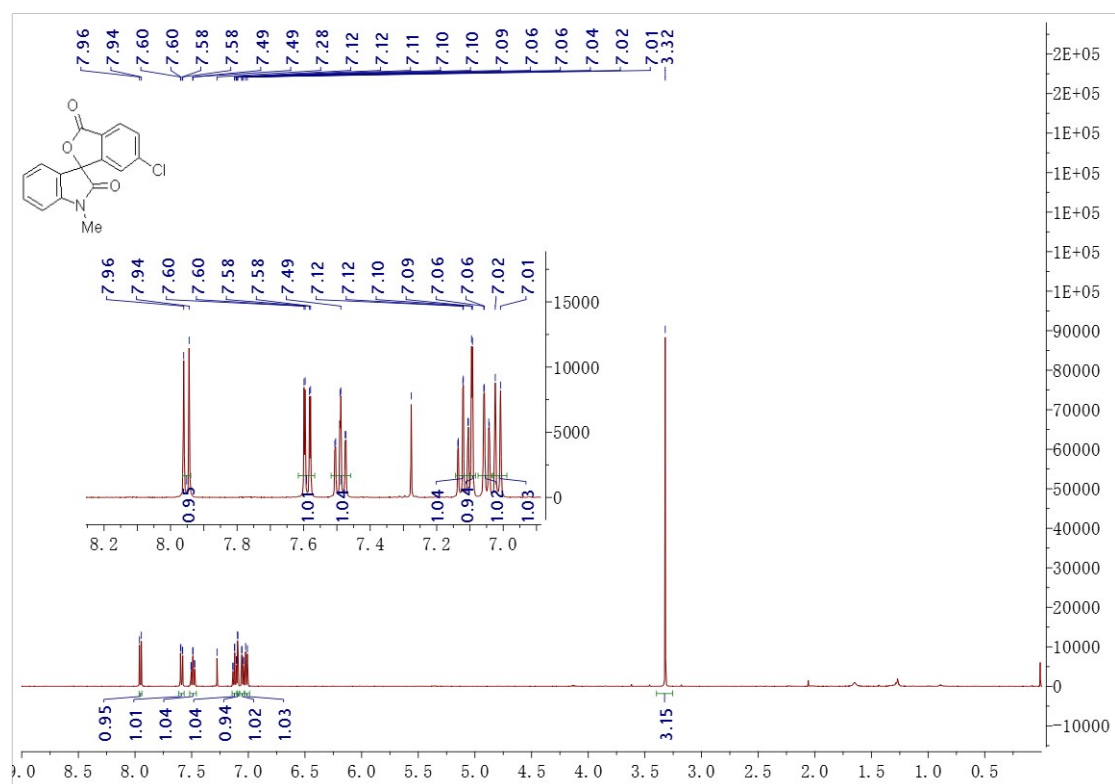

**6'-bromo-1-methyl-3'H-spiro[indoline-3,1'-isobenzofuran]-2,3'-dione (7k)**

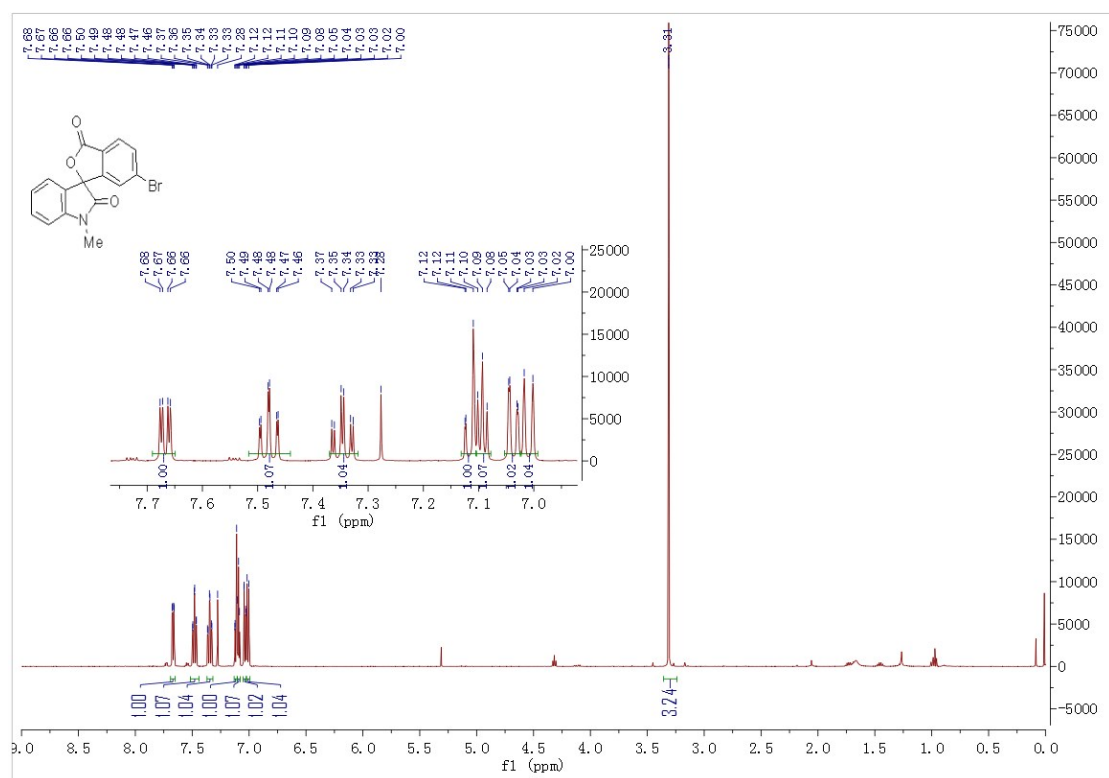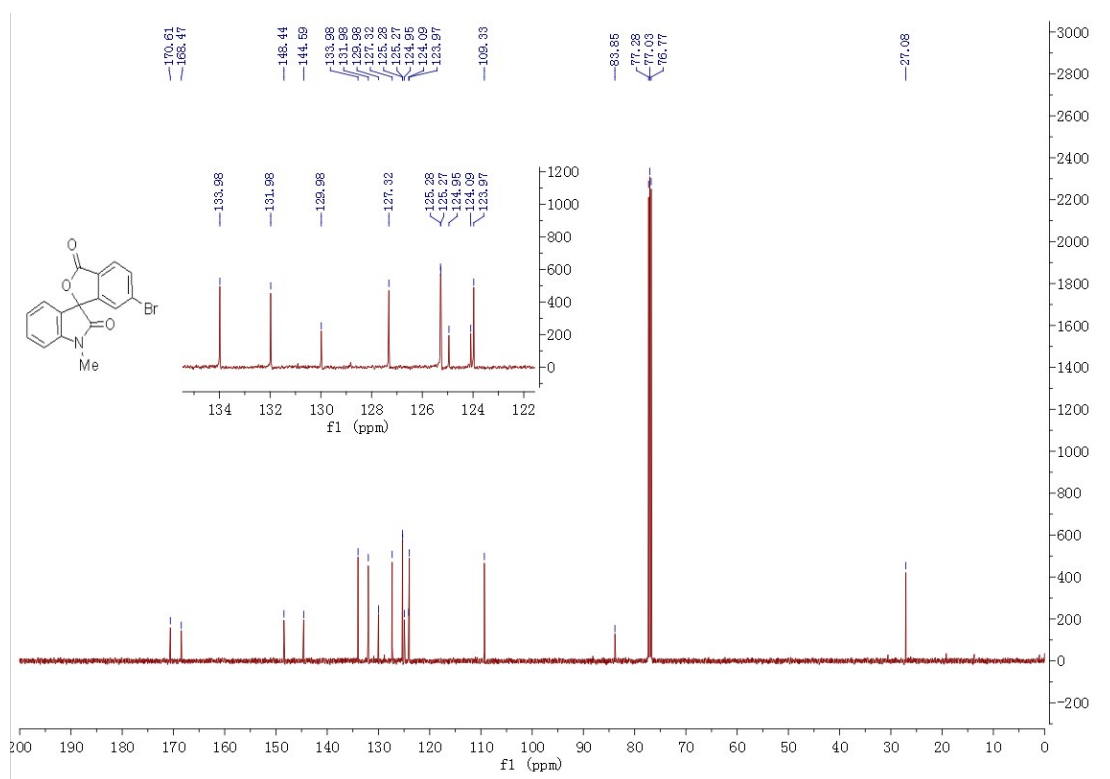

**5'-fluoro-1-methyl-3'H-spiro[indoline-3,1'-isobenzofuran]-2,3'-dione (7I)**



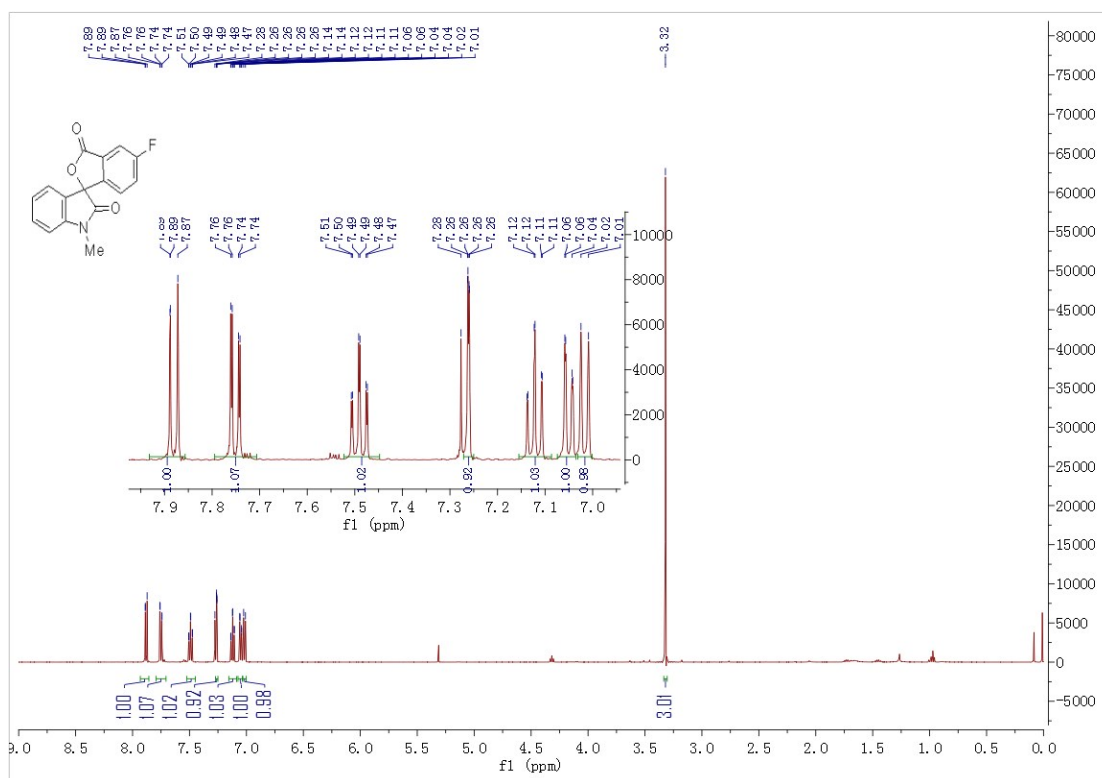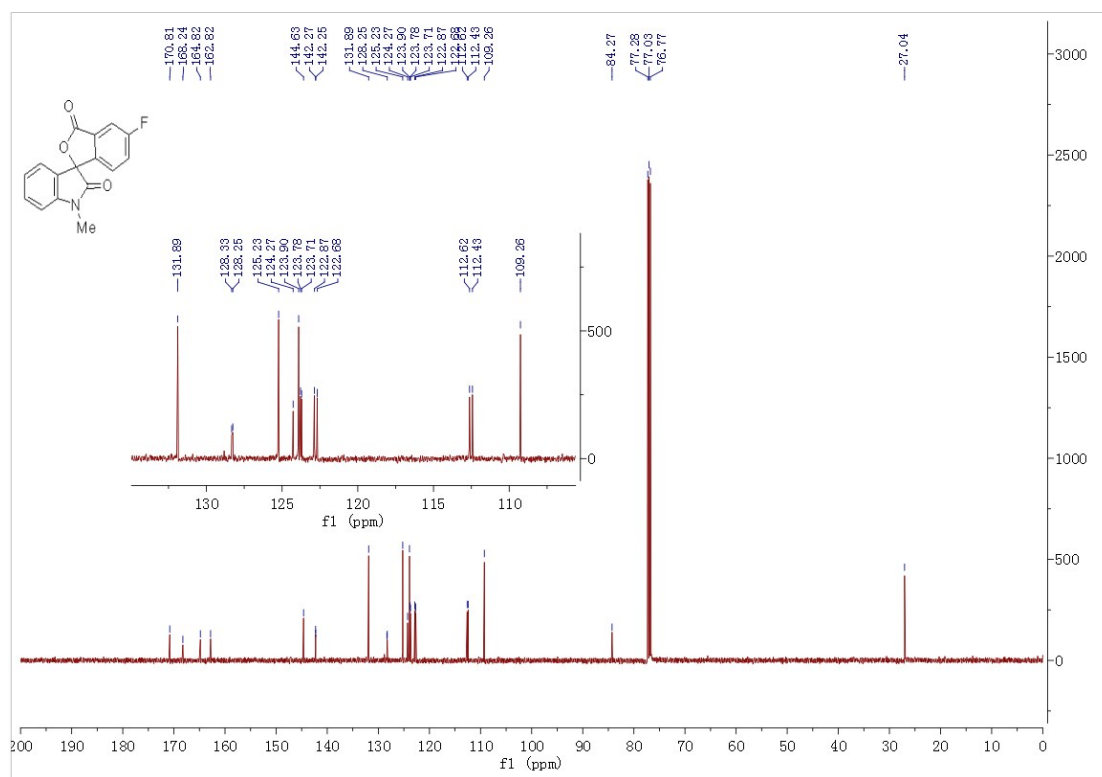

**1,5'-dimethyl-3'H-spiro[indoline-3,1'-isobenzofuran]-2,3'-dione (7m)**

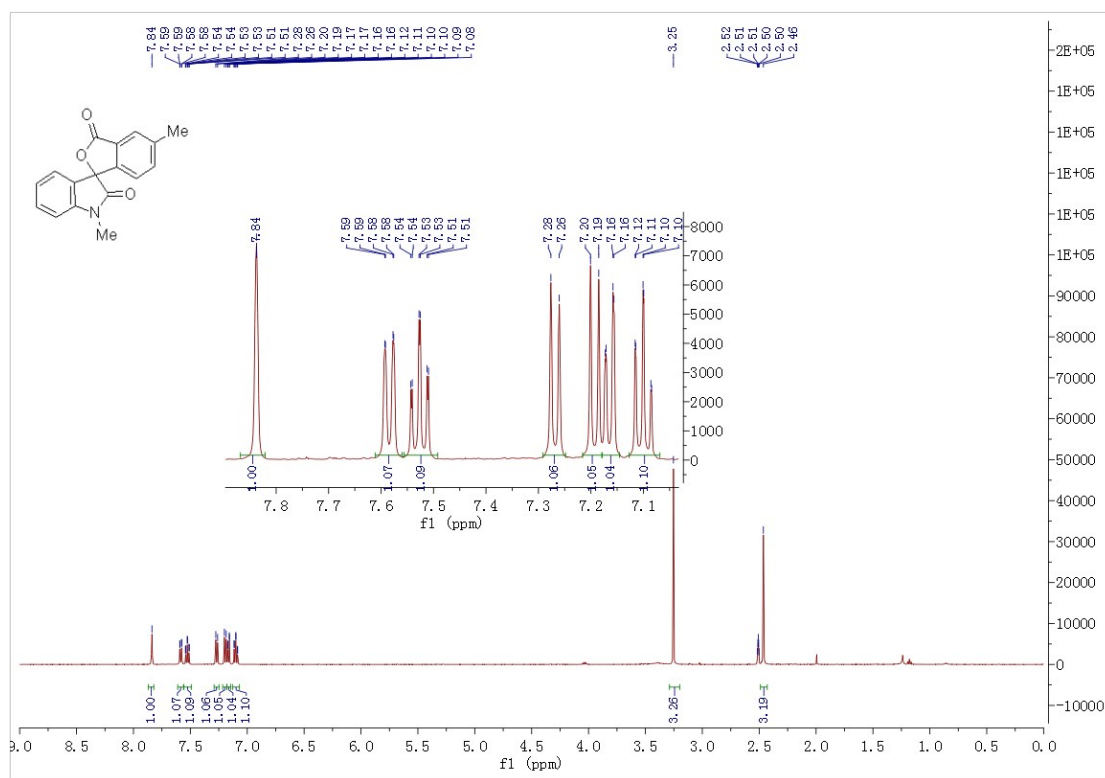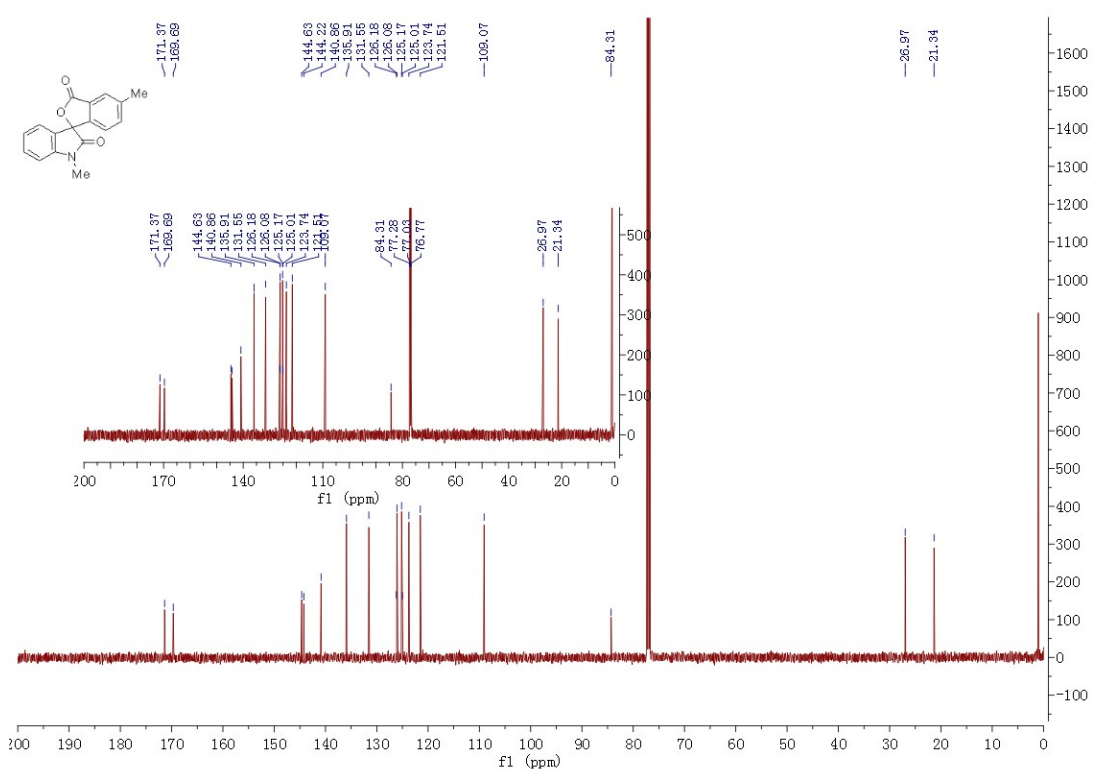

**5-methoxy-1,5'-dimethyl-3'H-spiro[indoline-3,1'-isobenzofuran]-2,3'-dione (7n)**

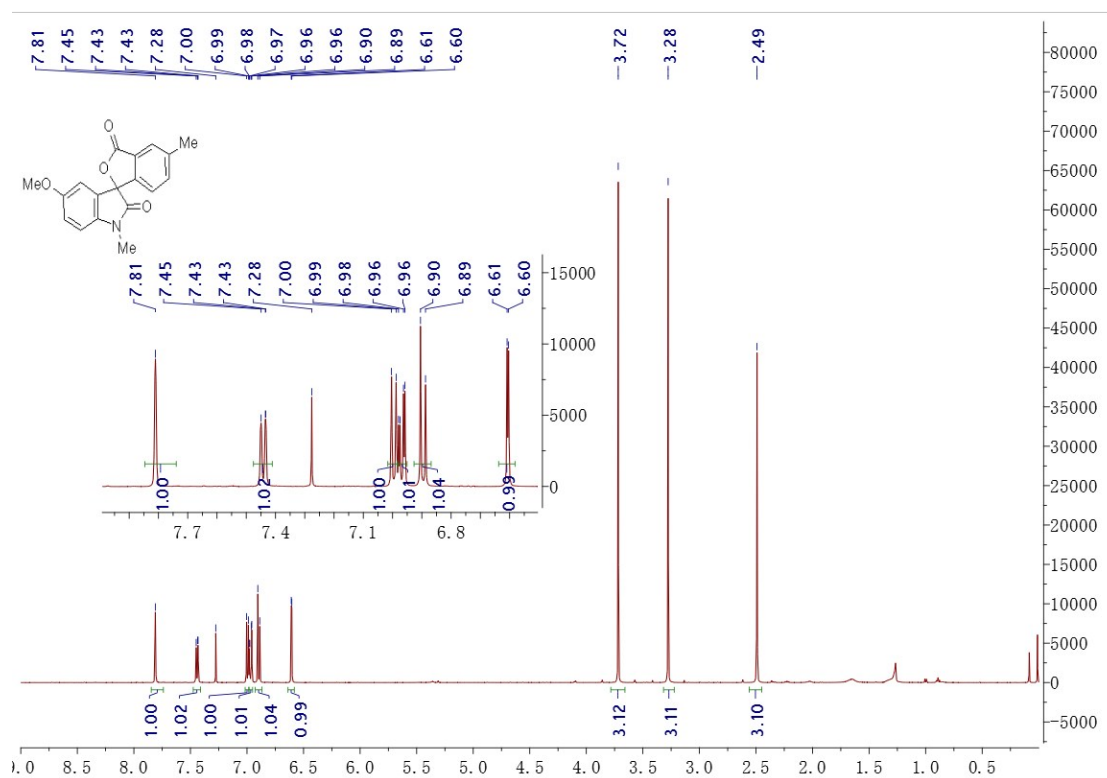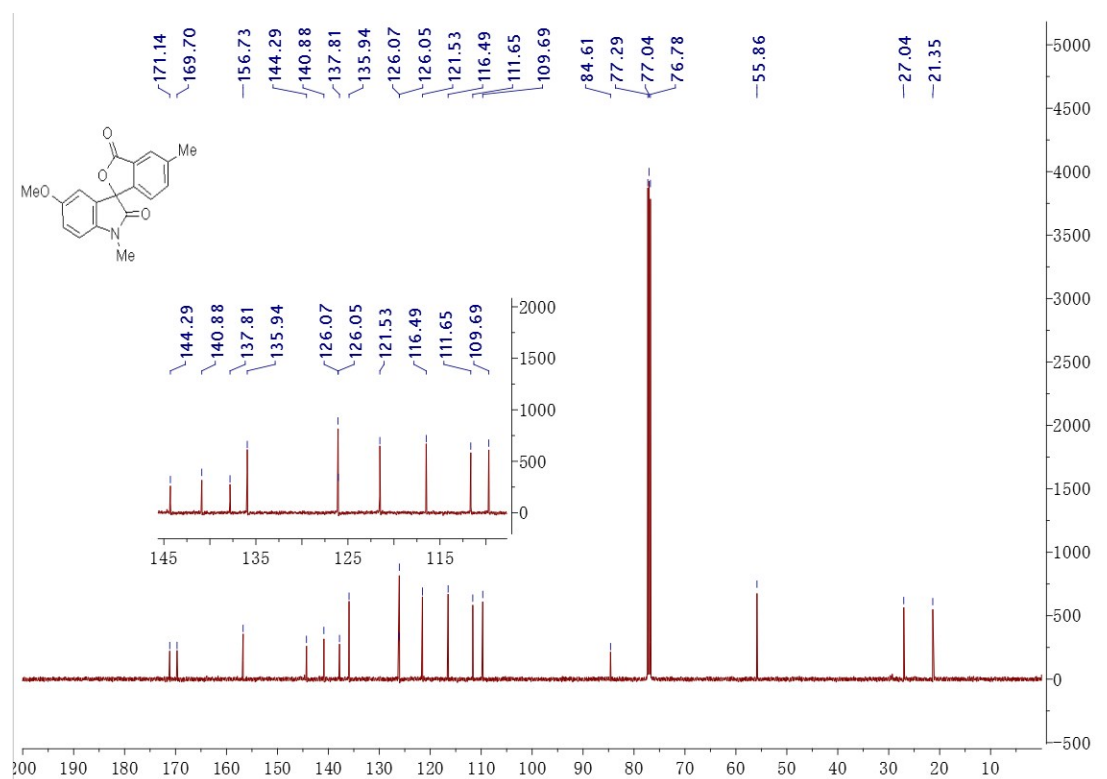

**5-chloro-6'-methoxy-1-methyl-3'H-spiro[indoline-3,1'-isobenzofuran]-2,3'-dione (7o)**

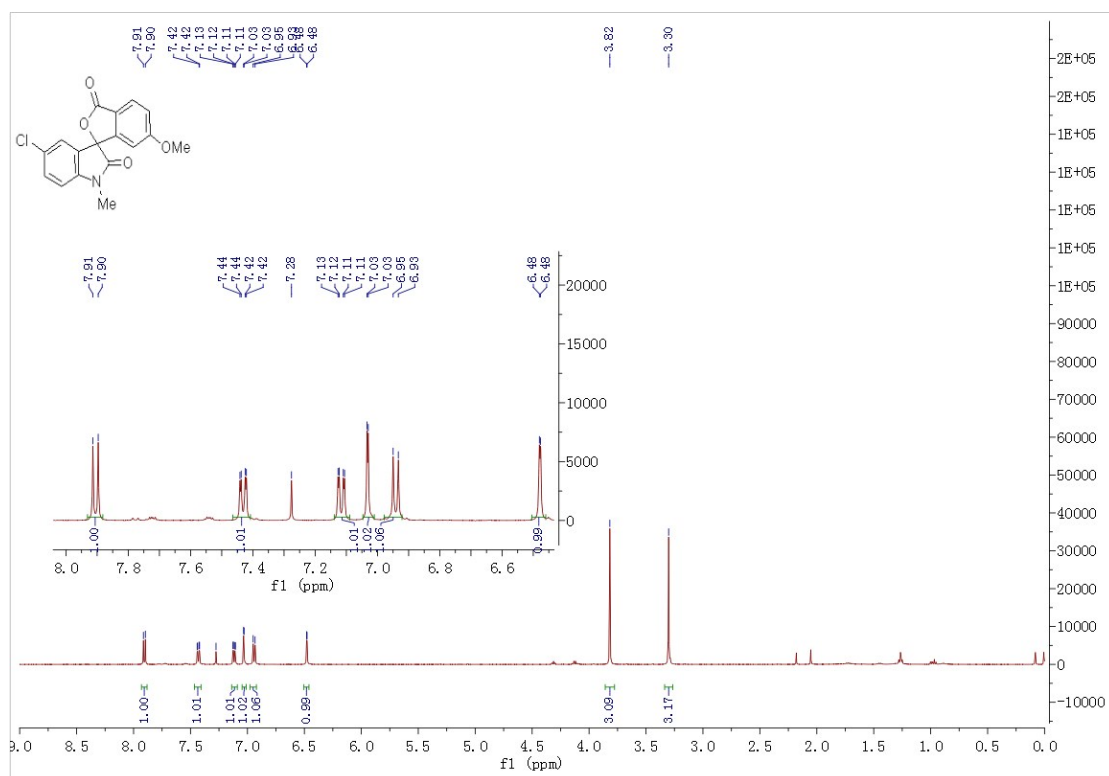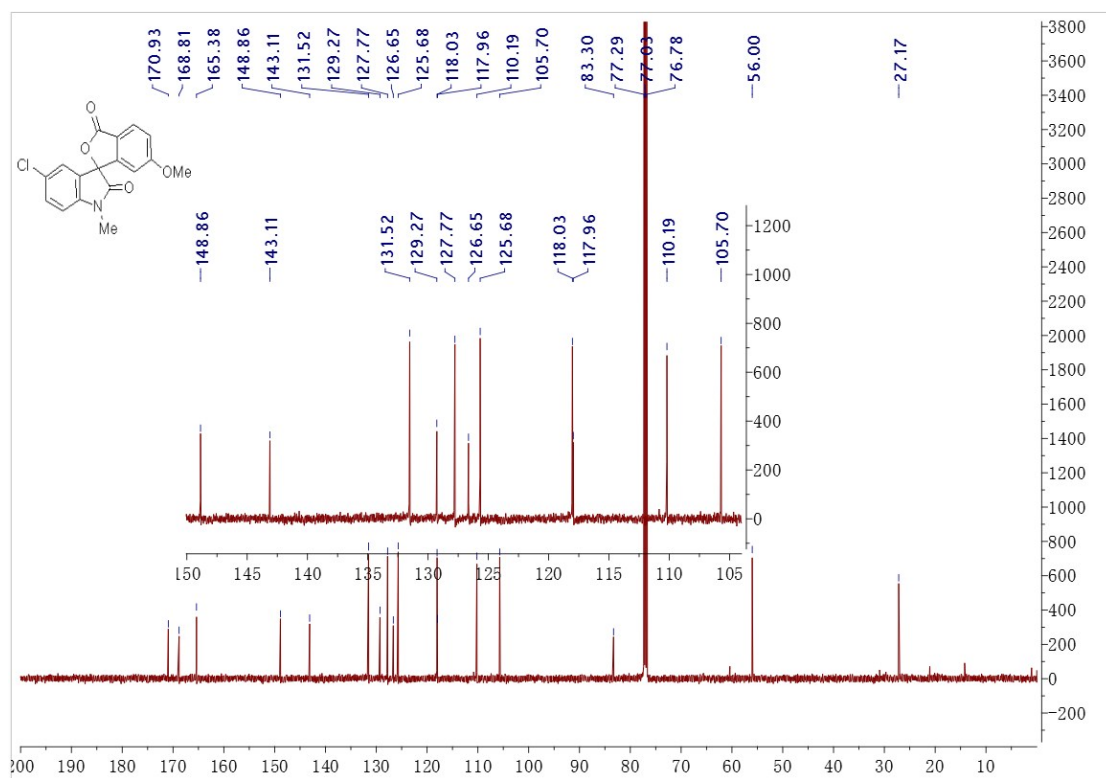

**5,6'-dichloro-1-methyl-3'H-spiro[indoline-3,1'-isobenzofuran]-2,3'-dione (7p)**

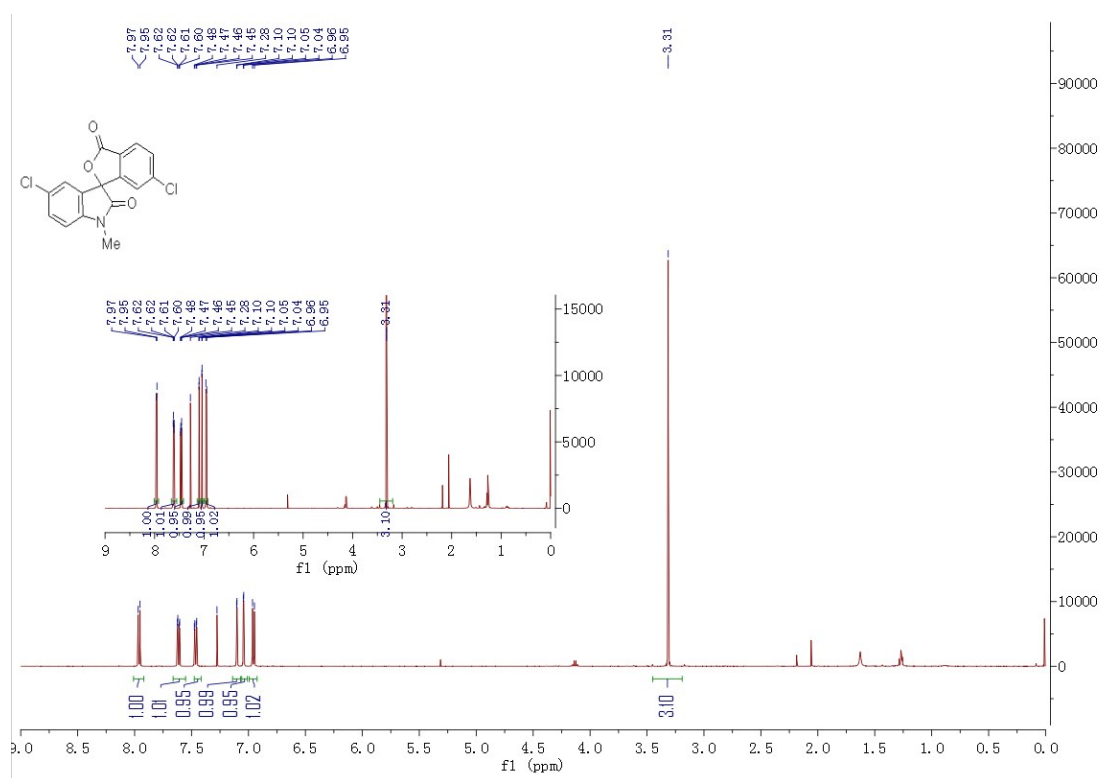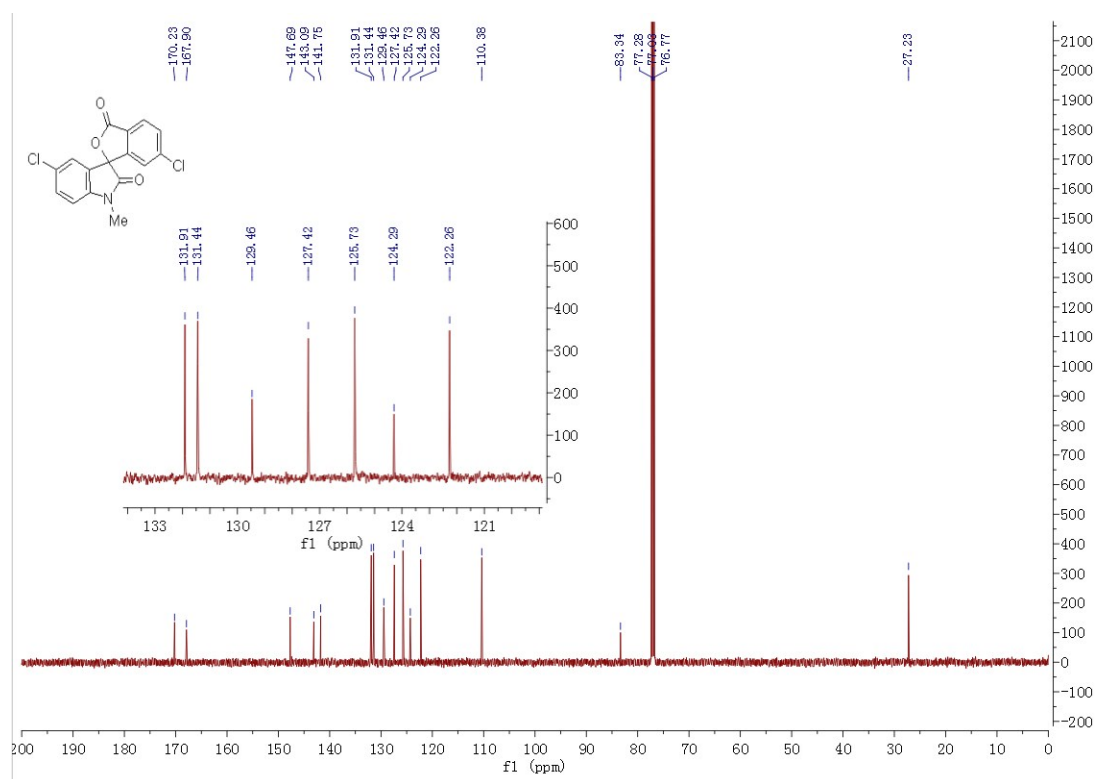

**2-hydroxy-1-methyl-2-phenylindolin-3-one (9)**



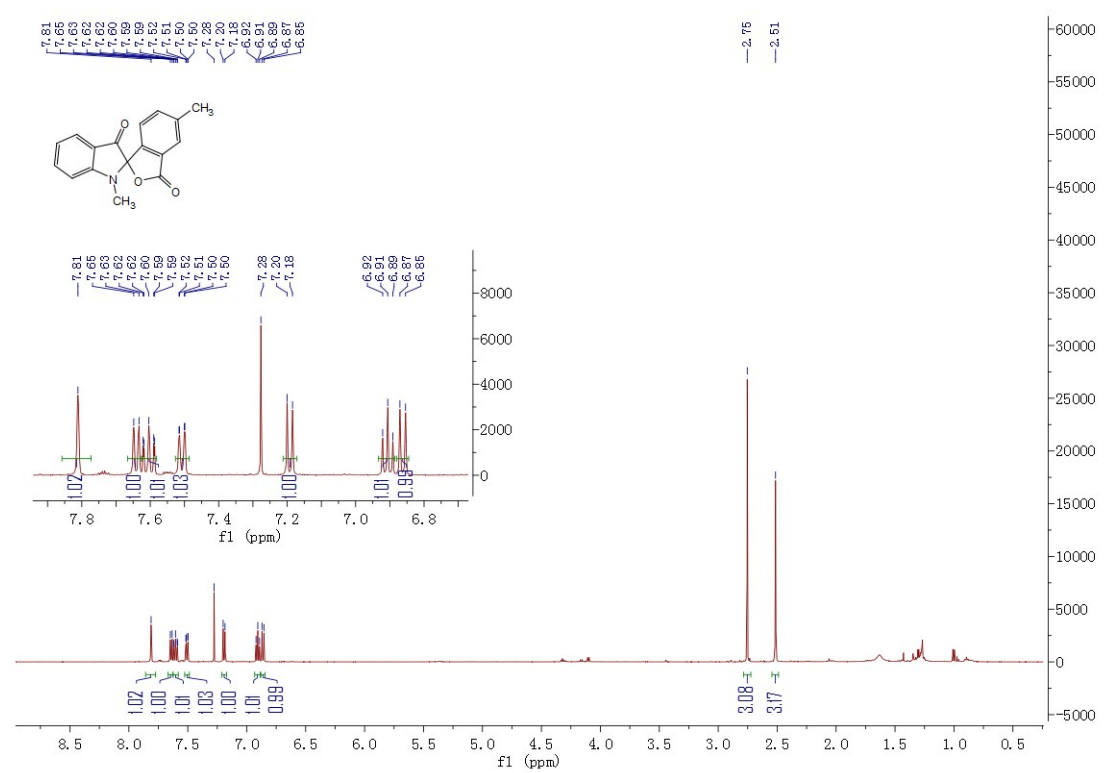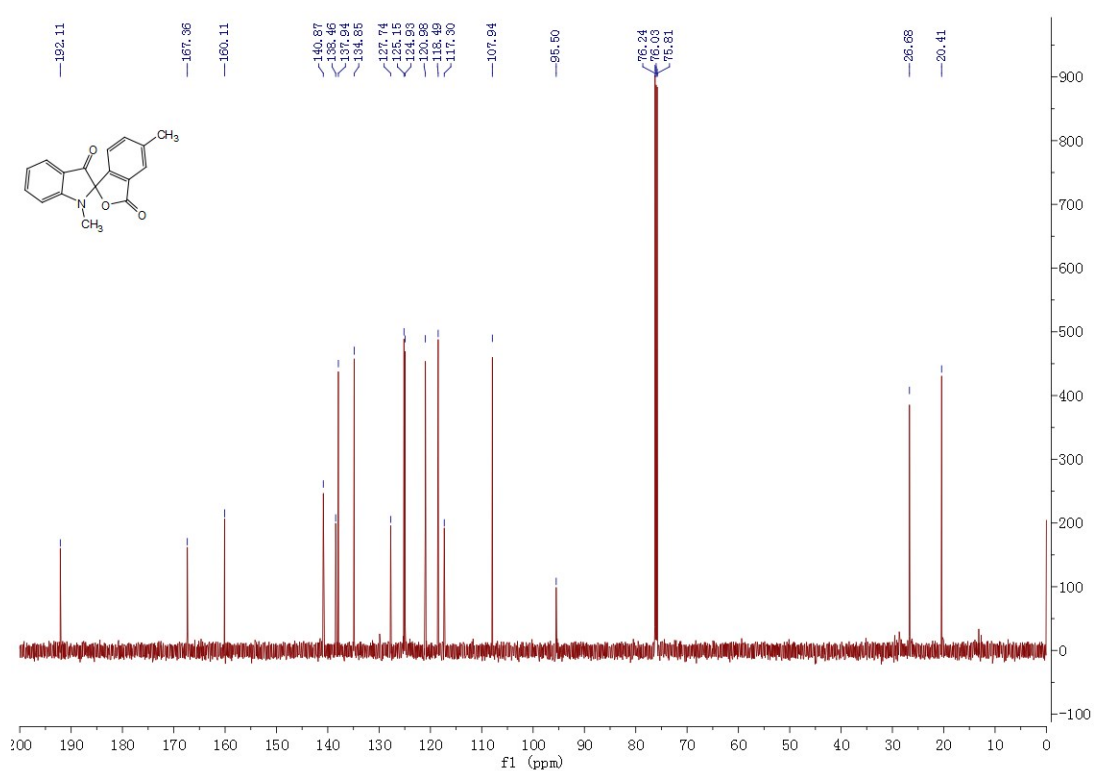

Ref. Scheme: New/Known <sup>1</sup>HNMR <sup>13</sup>CNMR LRMS HRMS IR Mp:



No.:

|    |                                                                                     |       |   |   |  |   |   |
|----|-------------------------------------------------------------------------------------|-------|---|---|--|---|---|
| 1a | 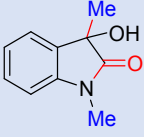   | Known | ✓ |   |  |   | ✓ |
| 1b |    | Known | ✓ |   |  |   | ✓ |
| 1c |    | new   | ✓ | ✓ |  | ✓ | ✓ |
| 1d |    | Known | ✓ |   |  |   | ✓ |
| 1e |  | Known | ✓ |   |  |   | ✓ |
| 1f |  | Known | ✓ |   |  |   | ✓ |
| 1g |  | Known | ✓ |   |  |   | ✓ |
| 1h |  | Known | ✓ |   |  |   | ✓ |
| 1i |  | Known | ✓ |   |  |   | ✓ |

|           |                                                                                     |              |   |   |   |   |
|-----------|-------------------------------------------------------------------------------------|--------------|---|---|---|---|
| <b>1j</b> | 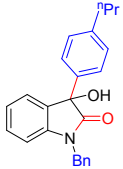   | <b>New</b>   | ✓ | ✓ |   | ✓ |
| <b>1k</b> |    | <b>Known</b> | ✓ | ✓ | ✓ | ✓ |
| <b>7a</b> |    | <b>New</b>   | ✓ | ✓ | ✓ | ✓ |
| <b>7b</b> |    | <b>New</b>   | ✓ | ✓ | ✓ | ✓ |
| <b>7c</b> |  | <b>New</b>   | ✓ | ✓ | ✓ | ✓ |
| <b>7d</b> |  | <b>New</b>   | ✓ | ✓ | ✓ | ✓ |
| <b>7e</b> |  | <b>New</b>   | ✓ | ✓ | ✓ | ✓ |
| <b>7f</b> |  | <b>New</b>   | ✓ | ✓ | ✓ | ✓ |
| <b>7g</b> |  | <b>New</b>   | ✓ | ✓ | ✓ | ✓ |

|    |                                                                                     |     |   |   |   |   |
|----|-------------------------------------------------------------------------------------|-----|---|---|---|---|
| 7h | 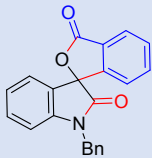   | New | ✓ | ✓ | ✓ | ✓ |
| 7i |    | New | ✓ | ✓ | ✓ | ✓ |
| 7j |    | New | ✓ | ✓ | ✓ | ✓ |
| 7k |    | New | ✓ | ✓ | ✓ | ✓ |
| 7l |  | New | ✓ | ✓ | ✓ | ✓ |
| 7m |  | New | ✓ | ✓ | ✓ | ✓ |
| 7n |  | New | ✓ | ✓ | ✓ | ✓ |
| 7o |  | New | ✓ | ✓ | ✓ | ✓ |
| 7p |  | New | ✓ | ✓ | ✓ | ✓ |

---

|   |                                                                                   |       |   |   |   |   |
|---|-----------------------------------------------------------------------------------|-------|---|---|---|---|
| 9 |  | known | ✓ | ✓ | ✓ | ✓ |
|---|-----------------------------------------------------------------------------------|-------|---|---|---|---|

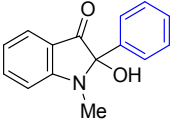

known

✓

✓

✓

✓

10

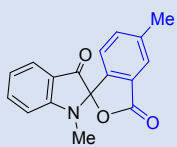

New

✓

✓

✓

✓
